1 **Axenic *in-vitro* cultivation of nineteen peat-moss (*Sphagnum* L.) species as a resource for basic**  
2 **biology, biotechnology and paludiculture**

3 Melanie A. Heck<sup>1</sup>, Volker M. Lüth<sup>1</sup>, Matthias Krebs<sup>2,3</sup>, Mira Kohl<sup>2,3</sup>, Anja Prager<sup>2,3</sup>, Hans Joosten<sup>2,3</sup>, Eva  
4 L. Decker<sup>1</sup> and Ralf Reski<sup>1,4,5</sup>

5

6 <sup>1</sup>Plant Biotechnology, Faculty of Biology, University of Freiburg, Freiburg, Germany; <sup>2</sup>Peatland Studies  
7 and Palaeoecology, Institute of Botany and Landscape Ecology, University of Greifswald, Greifswald,  
8 Germany; <sup>3</sup>Greifswald Mire Centre, Greifswald, Germany; <sup>4</sup>CIBSS – Centre for Integrative Biological  
9 Signalling Studies, University of Freiburg, Freiburg, Germany; <sup>5</sup>Cluster of Excellence *livMatS @ FIT* –  
10 Freiburg Center for Interactive Materials and Bioinspired Technologies, University of Freiburg,  
11 Freiburg, Germany

12

13 ORCID IDs:

14 0000-0002-0817-5679 (MAH)

15 0000-0002-2923-4236 (VML)

16 0000-0001-6336-327X (MaK)

17 0000-0002-5381-1961 (MiK)

18 0000-0002-1750-0592 (AP)

19 0000-0001-8694-5811 (HJ)

20 0000-0002-9151-1361 (ELD)

21 0000-0002-5496-6711 (RR)

22

23 Author for correspondence:

24 Ralf Reski

25 Phone: +49 761 2036969

26 Email: [ralf.reski@biologie.uni-freiburg.de](mailto:ralf.reski@biologie.uni-freiburg.de)

## 27 **Summary**

- 28
- The cultivation of *Sphagnum* mosses reduces CO<sub>2</sub> emissions by rewetting drained peatlands  
29 and by substituting peat with renewable biomass. ‘Sphagnum farming’ requires large volumes  
30 of founder material, which can only be supplied sustainably by axenic cultivation in  
31 bioreactors.
  - We established axenic *in-vitro* cultures from sporophytes of 19 *Sphagnum* species collected in  
32 Austria, Germany, Latvia, Netherlands, Russia and Sweden, namely *S. angustifolium*,  
33 *S. balticum*, *S. capillifolium*, *S. centrale*, *S. compactum*, *S. cuspidatum*, *S. fallax*, *S. fimbriatum*,  
34 *S. fuscum*, *S. lindbergii*, *S. medium/divinum*, *S. palustre*, *S. papillosum*, *S. rubellum*, *S. russowii*,  
35 *S. squarrosum*, *S. subnitens*, *S. subfulvum*, and *S. warnstorffii*. These species cover five of the  
36 six European *Sphagnum* sections, namely *Acutifolia*, *Cuspidata*, *Rigida*, *Sphagnum* and  
37 *Squarrosa*.
  - Their growth was measured in axenic suspension cultures, whereas their ploidy was  
38 determined by flow cytometry and compared with the genome size of *Physcomitrella patens*.  
39 We identified haploid and diploid *Sphagnum* species, found that their cells are predominantly  
40 arrested in the G1-phase of the cell cycle, and did not find a correlation between plant  
41 productivity and ploidy.
  - With this collection, high-quality founder material for diverse large-scale applications but also  
42 for basic *Sphagnum* research is available from the International Moss Stock Center (IMSC).
- 43
- 44
- 45
- 46

47 **Key words:** cell cycle arrest, climate change, genome size, peat moss, peatland restoration, species  
48 conservation, Sphagnum farming, *Sphagnum magellanicum*

## 49 Introduction

50 Peatlands cover over four million square kilometres, comprising 3% of Earth's land and freshwater  
51 surface (Joosten & Clarke, 2002), and contain about 30% of the global soil carbon (Gorham, 1991;  
52 Frolking and Roulet, 2007). Most peatlands in temperate and boreal zones were formed and are  
53 dominated by peat mosses, i.e. mosses of the genus *Sphagnum* (Clymo & Hayward, 1982; Joosten *et*  
54 *al.*, 2017). They accumulate dead organic matter ('peat') under wet, anoxic, acidic and nutrient-poor  
55 conditions, which lower microbial activity and reduce the decay of organic matter. As a result, pristine  
56 peatlands are carbon sinks, i.e. they sequester more carbon than they emit, and function as long-term  
57 carbon stores (Clymo & Hayward, 1982; Joosten *et al.*, 2016). Climate change scenarios assume that  
58 prolonged droughts, elevated temperatures and increased nitrogen deposition (Galloway *et al.*, 2008)  
59 decrease the growth of *Sphagnum* mosses and increase decay, thus reducing the amount of  
60 sequestered carbon (Limpens *et al.*, 2011; Norby *et al.*, 2019). Moreover, changing microbial  
61 communities might enhance the functional shift from sink to source (Lew *et al.*, 2019; Juan-Ovejero *et*  
62 *al.*, 2020; Rewcastle *et al.*, 2020). Together, its impact on global carbon cycling makes *Sphagnum* an  
63 important ecological model, attracting a growing number of scientists. Consequently, the first draft  
64 genome of *Sphagnum fallax* became available recently (v0.5, <http://phytozome.jgi.doe.gov/>) (Weston  
65 *et al.*, 2018). Although *Sphagnum* mosses are of growing economic importance for many applications,  
66 including waste water treatment (Couillard, 1994), as sensors of air pollution (Capozzi *et al.*, 2016,  
67 2017; Di Palma *et al.*, 2019; Aboal *et al.*, 2020) and as raw material for growing media (Wichmann *et*  
68 *al.* 2020), they are not yet analysed in great detail.

69 The global area of peatlands has been reduced significantly (10 to 20%) since 1800, in particular by  
70 drainage for agriculture and forestry. Moreover, peat serves as energy generation, and as substrate  
71 for horticulture (Joosten & Clarke, 2002). Drainage leads to peat mineralization and subsequent  
72 emissions of greenhouse gases (GHGs), such as CO<sub>2</sub> and N<sub>2</sub>O (Van Den Pol-Van Dasselaar *et al.*, 1999;  
73 Boon *et al.*, 2014; Carlson *et al.*, 2017). While drained peatlands cover only 0.4% of the land surface,  
74 they are responsible for 32% of cropland and almost 5% of anthropogenic GHG emissions globally  
75 (Joosten *et al.*, 2016; Carlson *et al.*, 2017). Leifeld *et al.* (2019) estimated that in 1960 the global  
76 peatland biome turned from a net sink to a net source of soil-derived GHGs. Further, these authors  
77 predict a cumulative emission from drained peatlands of 249 +/- 38 petagrams of CO<sub>2</sub> equivalent by  
78 2100 if the current trend continues.

79 Rewetting of drained peatlands decreases these emissions and may even restore the carbon sink  
80 function (Joosten *et al.*, 2016; Wichmann *et al.*, 2016). Rewetting, however, makes conventional  
81 drainage-based land use impossible (Wichmann *et al.*, 2017). Paludiculture, wet agriculture and  
82 forestry on peatlands, allows land use to continue and to combine emission reduction with biomass

83 production. It includes traditional peatland cultivation (reed mowing, litter usage) and new approaches  
84 for utilization (Abel *et al.*, 2013; Wichtmann *et al.*, 2016).

85 Sphagnum farming on rewetted bogs is a promising example of paludiculture as it produces *Sphagnum*  
86 biomass as a substitute for peat (Gaudig & Joosten, 2002; Gaudig *et al.*, 2014, 2018; Decker & Reski,  
87 2020). It decreases GHG emissions substantially by rewetting drained peatlands, by avoiding the use  
88 and oxidation of fossil peat, and by preserving hitherto undrained peatlands as carbon stores and sinks  
89 (Wichtmann *et al.*, 2016; Günther *et al.*, 2017). Potential sites for Sphagnum farming are degraded  
90 bogs and acidic water bodies (Wichmann *et al.*, 2017).

91 Different environmental conditions, e.g. water level or nutrient supply, and different requirements of  
92 the produced biomass call for a variety of peat-moss species and genotypes as founder material for  
93 Sphagnum farms (Gaudig *et al.*, 2018). Lack of sufficient founder material is currently a major  
94 bottleneck for the large-scale implementation of Sphagnum farming. In the European Union,  
95 *Sphagnum* species and their habitats are protected by the Council Directive 92/43/EEC, constraining  
96 the collection of founder material from natural habitats. Furthermore, commercial Sphagnum farming  
97 requires *Sphagnum* material without unwanted biological contaminations (Gaudig *et al.*, 2018) and of  
98 a constitution that is fit-for-purpose. Moss clones established from a single spore or plant share the  
99 same genetic, physiological and environmental background, allowing the multiplication of selected  
100 clones to achieve maximum yields. *Sphagnum* founder material of controlled quality can be produced  
101 under aseptic conditions with standard tissue culture methods (Caporn *et al.*, 2017), but probably  
102 more rapidly by axenic cultivation in bioreactors.

103 An important step towards the large-scale production of such founder material was the development  
104 of an axenic photobioreactor production process for *Sphagnum palustre*, using monoclonal material  
105 generated from a single spore (Beike *et al.*, 2015). Under standardized laboratory conditions, the  
106 multiplication rate of the material was up to 30-fold within four weeks. The phenotypic characteristics  
107 of *in-vitro* cultivated *S. palustre* plants were comparable to those of plants from natural habitats (Beike  
108 *et al.*, 2015). A further improvement to vegetative *in-vitro* propagation of *Sphagnum* is the  
109 establishment of a protonema-proliferation protocol for *S. squarrosum* (Zhao *et al.*, 2019). Besides  
110 these two species, we found only one report of the establishment of *S. fallax* cultures in a bioreactor  
111 (Rudolph *et al.*, 1988) and to our knowledge, no other *Sphagnum* species were analysed in axenic  
112 laboratory conditions so far.

113 Here, we report on the establishment of axenic *in-vitro* cultures of 19 *Sphagnum* species from five  
114 peat-moss sections and compare their growth behaviour, their genome size and their cell cycle. With  
115 this collection, high-quality founder material for diverse large-scale applications, but also for basic  
116 *Sphagnum* research is available.

## 117 **Materials & methods**

### 118 **Decontamination of sporophytes and spore germination**

119 We collected sporophytes from 19 *Sphagnum* species in the field (Table 1) and stored them at 4°C. The  
120 taxonomic status of the *S. medium/divinum* clones needs clarification to accommodate for taxonomic  
121 insights (Hassel *et al.*, 2018) after collection. Spore capsules were surface-sterilized and opened with  
122 forceps in 1 ml of sodium hypochlorite solution. The solution was freshly prepared with autoclaved  
123 water with 2 drops of Tween 20 per 500 ml H<sub>2</sub>O and a final concentration of either 0.6%, 1.2% or 2.4%  
124 NaClO. The incubation was stopped at different time points between 30 sec and 7 min by transferring  
125 100 µl of the suspension to 1 ml autoclaved water. From this dilution, 500 µl were transferred to a  
126 sterile Petri dish, which contained one of the following solid media: 1) Knop medium (1.84 mM KH<sub>2</sub>PO<sub>4</sub>,  
127 3.35 mM KCl, 1.01 mM MgSO<sub>4</sub>, 4.24 mM Ca(NO<sub>3</sub>)<sub>2</sub>, 45 µM FeSO<sub>4</sub>) according to Reski & Abel (1985)  
128 supplemented with microelements (50 µM H<sub>3</sub>BO<sub>3</sub>, 50 µM MnSO<sub>4</sub>, 15 µM ZnSO<sub>4</sub>, 2.5 µM KJ, 500 nM  
129 Na<sub>2</sub>MoO<sub>4</sub>, 50 nM CuSO<sub>4</sub>, 50 nM Co(NO<sub>3</sub>)<sub>2</sub>) according to Schween *et al.* (2003a), or 2) *Sphagnum*  
130 medium (Knop medium with microelements (ME), 0.3 % sucrose and 1.25 mM NH<sub>4</sub>NO<sub>3</sub>) according to  
131 Beike *et al.* (2015). Petri dishes were sealed with Parafilm (Carl Roth, Germany), and cultivated under  
132 standard growth conditions: climate chamber, temperature of 22°C, photoperiod regime of 16 h : 8 h  
133 (light : dark), light intensity of 70±5 µmol m<sup>-2</sup> s<sup>-1</sup> provided by fluorescent tubes. Light intensities were  
134 measured with a planar quantum sensor (Li-Cor 250, Li-Cor Biosciences, Bad Homburg, Germany).  
135 After spore germination, filaments were separated and transferred to new Petri dishes containing  
136 either solid Knop ME or solid *Sphagnum* medium under sterile conditions using needles and a stereo  
137 microscope (Stemi 2000-C, Zeiss, Jena, Germany). Plates containing one of the following media: 1)  
138 Knop ME supplemented with 1% glucose and 12 g l<sup>-1</sup> Purified Agar (Oxoid Limited, UK), 2) LB (10 g l<sup>-1</sup>  
139 Bacto Tryptone (Becton, Dickinson and Company, NJ, USA), 10 g l<sup>-1</sup> NaCl, 5 g l<sup>-1</sup> Bacto Yeast Extract  
140 (Becton, Dickinson and Company) and 15 g l<sup>-1</sup> Bacto Agar (Becton, Dickinson and Company)), or 3)  
141 Tryptic Soy Agar (TSA) with 1% glucose (15 g l<sup>-1</sup> peptone from casein, 5 g l<sup>-1</sup> soy peptone, 5 g l<sup>-1</sup> NaCl)  
142 and 12 g l<sup>-1</sup> purified agar (Oxoid Limited, UK) served as controls. These plates were sealed with  
143 Parafilm, stored and inspected at room temperature. If no contamination occurred within four weeks,  
144 we considered a culture as axenic.

### 145 ***In-vitro* cultivation**

146 Gametophores were cultivated on solid media and in suspension. For cultivation on solid medium,  
147 gametophores were transferred to Knop ME or *Sphagnum* medium. The Petri dishes were sealed with  
148 Parafilm and cultivated under standard conditions.

149 For suspension cultures, gametophores were disrupted with forceps in laminar flow benches, and  
150 transferred to 35 ml Sphagnum medium in 100 ml Erlenmeyer flasks. Flasks were closed with Silicosen®  
151 silicone sponge plugs (Hirschmann Laborgeräte, Eberstadt, Germany) and agitated on a rotary shaker  
152 at 120 rpm (B. Braun Biotech International, Melsungen, Germany) under standard conditions.

### 153 **Light microscopy**

154 Gametophores were analysed with a stereo microscope (SZX7, Olympus Corporation, Tokyo, Japan)  
155 and a camera (AxioCam ICc 1, Zeiss, Jena, Germany). Photographs were scaled with AxioVision  
156 software 4.8 (Zeiss). Stacks of images with different focal points were combined with CombineZ 5.3  
157 (Alan Hadley, <https://combinezp.software.informer.com/>).

### 158 **Growth determination**

159 Plant growth was determined on solid media as well as in suspension (**Fig. 1**). First, growth of up to 16  
160 clones of each species was determined on agar plates with both Knop ME and Sphagnum medium.  
161 Clones were randomly selected from all available spore capsules. The uppermost five millimetres from  
162 the tip of each gametophore (the capitulum) was cut, transferred to solid media and cultivated under  
163 standard conditions for four weeks (**Fig. 1**). Growth was documented photographically every week.  
164 The pictures were transferred into binary images and the area was assessed by counting the pixels (**Fig.**  
165 **1a**) using ImageJ version 1.51f (Wayne Rasband, <https://imagej.nih.gov/ij/>). Only the area of growth  
166 was analysed, not the height of the gametophore. Additionally, shape and colour were visually  
167 assessed to select the six largest clones of each species after four weeks of growth. These were  
168 subsequently assessed for biomass increase in suspensions.

169 Three gametophores per clone were transferred to 50 ml Sphagnum medium in 100 ml Erlenmeyer  
170 flasks and cultivated under standard conditions for six weeks. Subsequently, the total biomass was  
171 harvested by filtering with a Büchner funnel and a vacuum pump. The moss material was transferred  
172 to pre-dried (0.5 h at 105°C) aluminium weighing pans (Köhler Technische Produkte, Neulußheim,  
173 Germany) and dried for 2 hours at 105°C. Subsequently, the dry weight (DW) was determined with an  
174 accuracy scale (CPA 3245, Sartorius, Göttingen, Germany) (**Fig. 1b**). The clone with the highest DW  
175 increase of each species was selected as best grown clone.

a) Determination on solid medium

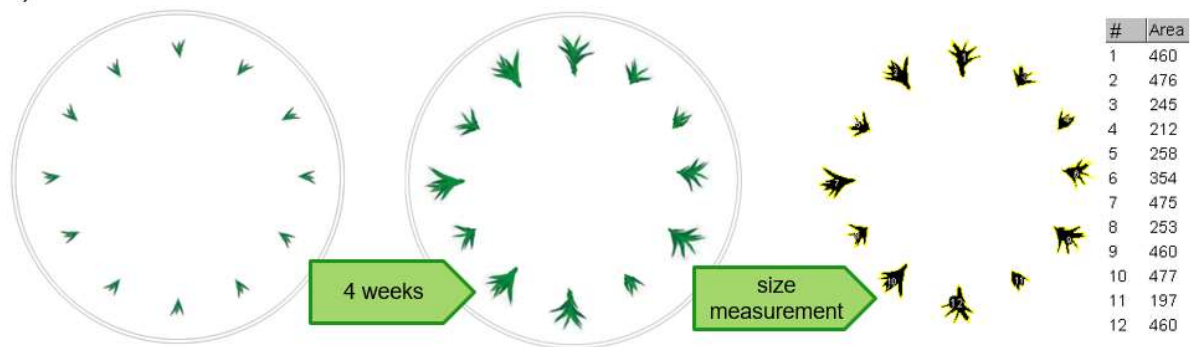

b) Determination in liquid medium

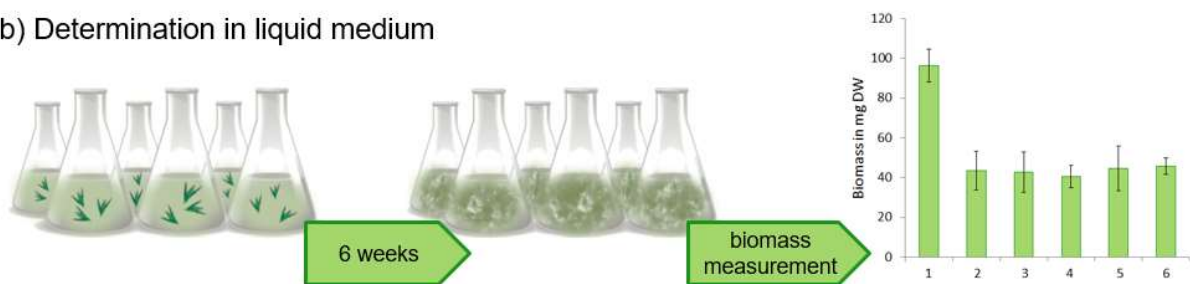

**Fig. 1** Schematic representation of the growth determination of *Sphagnum* spp. a) on solid medium, b) in suspension cultures. a) Gametophores of the same size were transferred to a Petri dish and cultivated for four weeks. The growth was documented photographically and the size analysed by image processing supported area measurement using ImageJ. b) Gametophores were transferred to Erlenmeyer flasks and cultivated for six weeks. Growth was determined by dry weight measurement of the biomass.

176 **Flow-cytometry**

177 Ploidy levels of the six best-grown clones of each species were determined via flow-cytometry (FCM).  
 178 Gametophores were chopped with a razor blade in 0.5 ml 4',6-diamidino-2-phenylindol (DAPI) solution  
 179 (Carl Roth, Germany) containing 0.01 mg l<sup>-1</sup> DAPI, 1.07 g l<sup>-1</sup> MgCl<sub>2</sub>·6H<sub>2</sub>O, 5 g l<sup>-1</sup> NaCl, 21.11 g l<sup>-1</sup> TRIS and  
 180 1 ml l<sup>-1</sup> Triton X-100. Afterwards, 1.5 ml DAPI solution was added and the material filtered through a  
 181 30µm sieve, and subsequently analysed with a Flow Cytometer Partec CyFlow® Space (Sysmex Partec,  
 182 Görlitz, Germany), equipped with a 365 nm UV-LED. *Physcomitrella patens* protonema served as  
 183 internal standard (modified after Schween *et al.*, 2003b).

184 **Statistical analysis**

185 To determine significance values between the growths of the clones, data were analysed by one-way  
 186 analysis of variance (ANOVA), where p values below 0.05 were considered as significant. Afterwards,  
 187 each data set was tested with Student's t-test, where \*\*\*, \*\* and \* denote significance at the 0.1%,  
 188 1% and 5% level, respectively. Statistical analyses were performed with GraphPad Prism® and diagrams  
 189 were created with Excel 2016.

## 190 **Results and discussion**

### 191 **Induction of axenic *in-vitro* cultures**

192 Surface sterilization of spore capsules is an established method to start axenic *in-vitro* cultivation  
193 (Beike *et al.*, 2015). *Sphagnum* spores are still viable after 13 years when stored in the cold and they  
194 can form persistent spore banks in nature (Sundberg & Rydin, 2000). We observed spore germination  
195 in *S. angustifolium* and *S. fimbriatum* after three years storage at 4°C. However, we decontaminated  
196 most sporophytes within two months after collection. Detergent concentration and exposure time  
197 were adjusted individually for each sporophyte. We did not find a correlation between species or  
198 sporophyte maturation level and exposure time for successful decontamination and germination of  
199 spores. Sugar accelerated spore germination of all species except *S. compactum*, but all species except  
200 *S. warnstorffii* also germinated on Knop ME. Filaments developed from sterilized spores after 2 – 20  
201 weeks with high variations within every species. Single gametophores were separated, and  
202 subsequently cultivated on solid medium as independent clones.

203 Beike *et al.* (2015) showed that *in-vitro* cultivated *S. palustre* plants and plants taken from natural  
204 habitats have similar phenotypic characteristics. However, in that study *in-vitro* grown gametophores  
205 were smaller and the shoots had more lanceolate leaves compared to the cucullate, ovate leaves of  
206 the thicker and heavier field shoots. We observed such deviating morphological characteristics for all  
207 19 *in-vitro* cultivated *Sphagnum* species (**Fig. 2**). Differences in spore germination, plant development  
208 and plant morphology between axenic moss cultures and field-grown mosses may be due, besides  
209 obvious abiotic factors and speed of growth, to effects of the microbiome present only in the latter.  
210 Cross-kingdom and cross-clade signalling via small molecules can influence morphology of *Sphagnum*  
211 similar to *Physcomitrella patens* (Kostka *et al.*, 2016; Decker *et al.*, 2017; Vesty *et al.*, 2020).



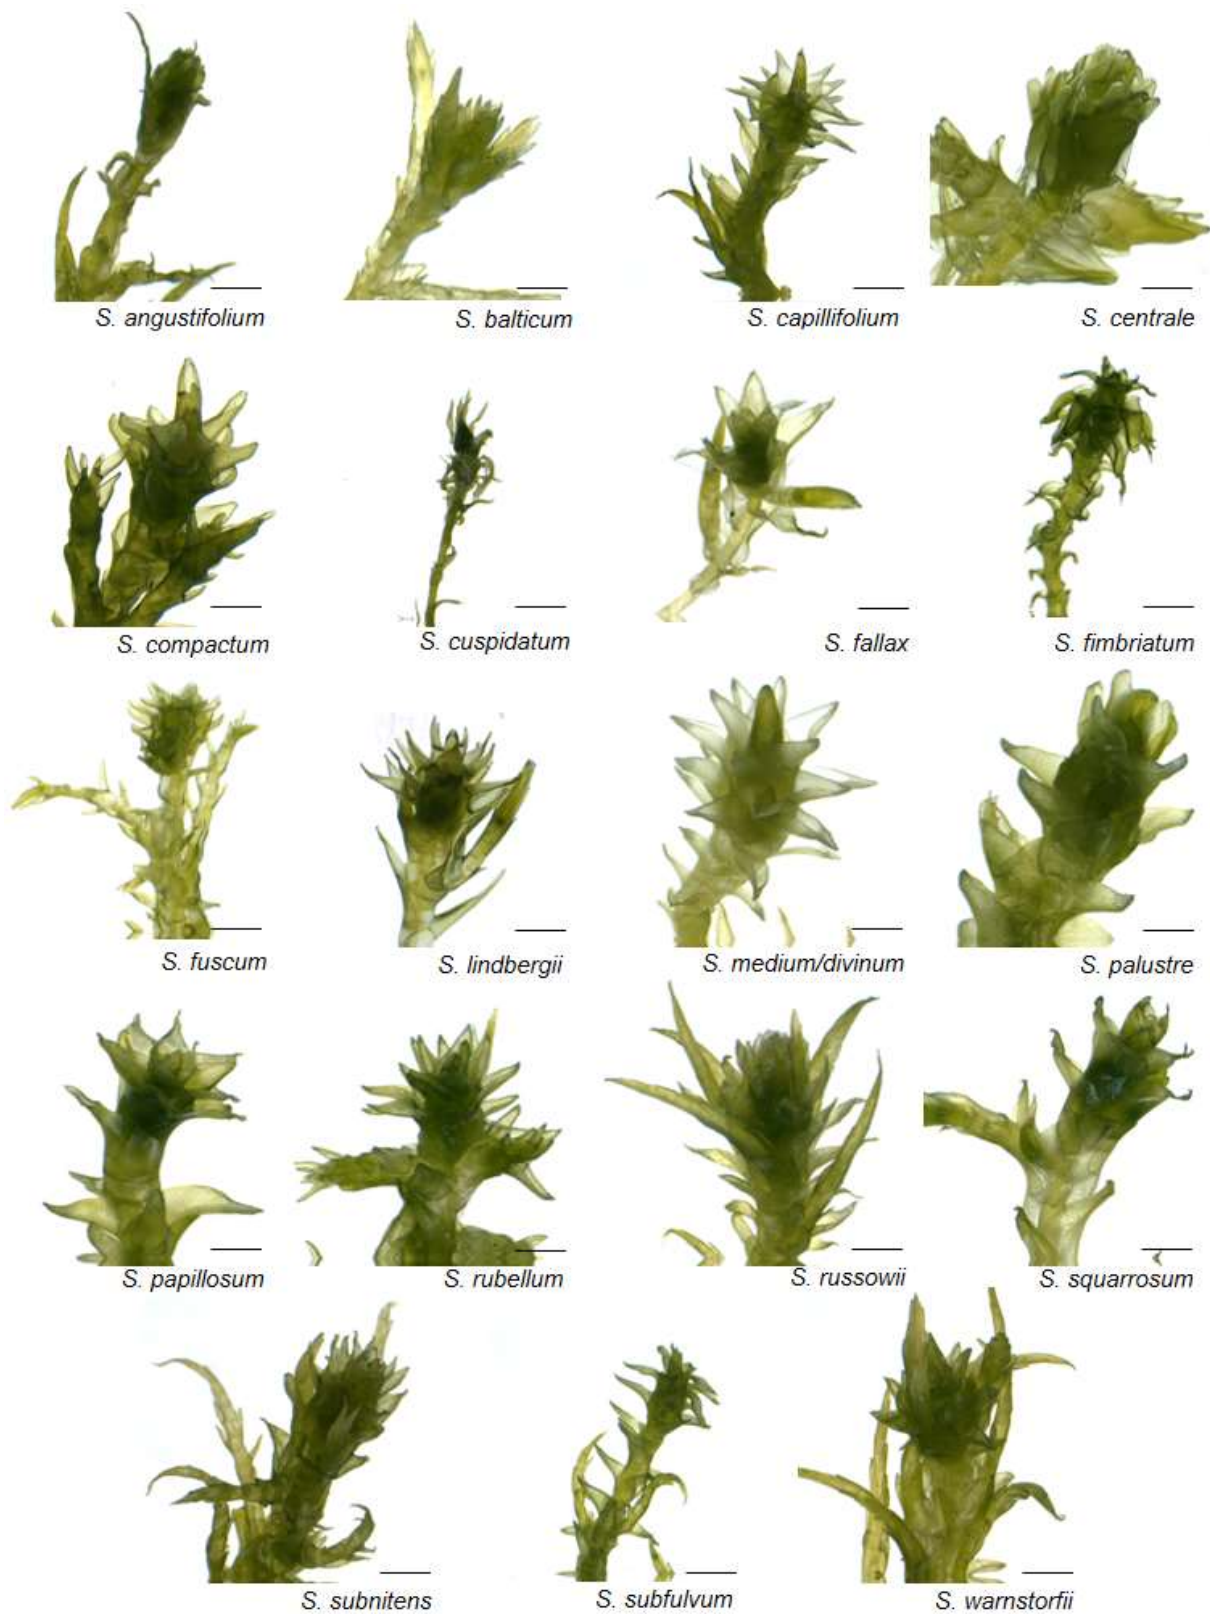

**Fig. 2** Light microscopic images of characteristic gametophores of *Sphagnum* spp. after four weeks of axenic cultivation on solid *Sphagnum* medium. Scale bar = 1 mm.

## 212 Selection of the best-growing clones

213 For subsequent analyses, we reduced the number of clones by preselection on solid medium.  
 214 Cultivation on solid medium allows long-term storage; while suspension cultures yield higher amounts  
 215 of biomass (Beike *et al.*, 2015).

216 We describe the selection of the best-growing clone here in detail for *Sphagnum fuscum*, whilst  
 217 descriptions for the other species are in the supplement (Figures S1-S17). Capitula of eight *S. fuscum*  
 218 clones were cultivated on solid Knop ME and on solid Sphagnum medium, respectively (**Fig. 3**). Two  
 219 clones were selected from capsule 1, four clones from capsule 2 and two clones from capsule 3, all  
 220 collected from the same location in Sweden.

221 Sphagnum medium comprises Knop ME, sucrose and ammonium nitrate. Previous studies described  
 222 growth enhancement of *Sphagnum* by sucrose or other saccharides (Simola, 1969; Graham *et al.*, 2010;  
 223 Beike *et al.*, 2015), or a nitrogen source (Simola, 1975; Beike *et al.*, 2015). Fertilization, especially the  
 224 addition of nitrogen and phosphorus, can affect the morphology of *Sphagnum* (Fritz *et al.*, 2012).

225 Gametophores on Sphagnum medium were more compact with a darker green colour compared to  
 226 gametophores on Knop ME, as depicted for *S. fuscum* in **Fig. 3a II, b II**. We found this effect for all  
 227 *Sphagnum* species in our study.

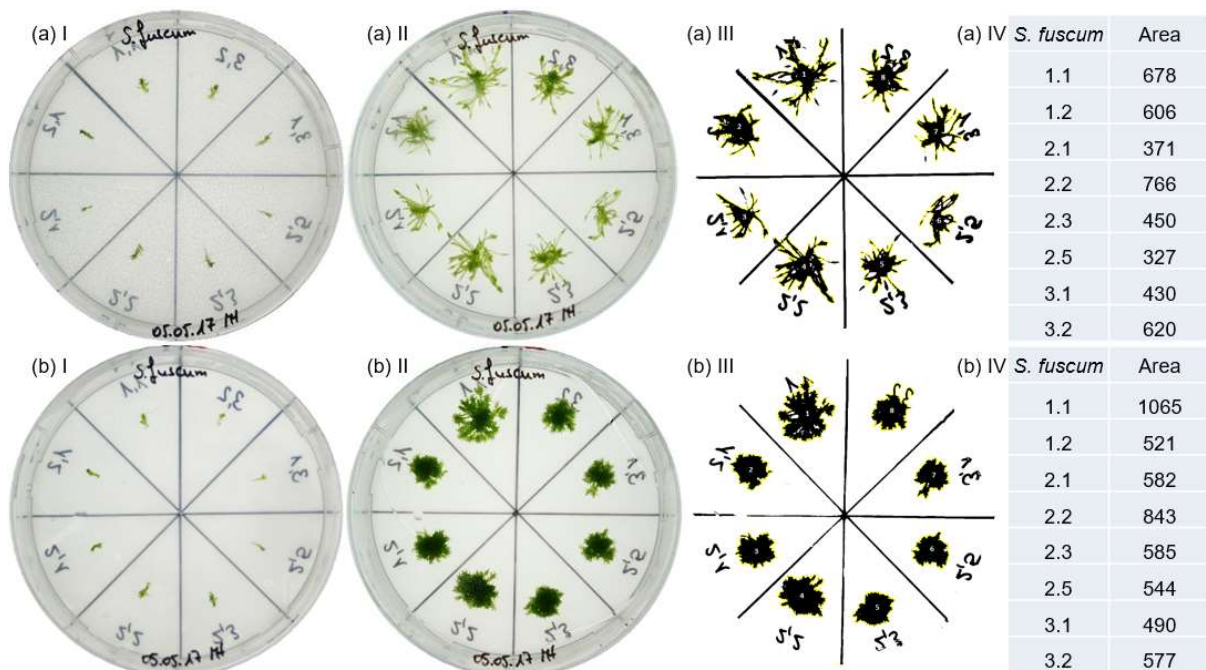

**Fig. 3** Growth determination of *Sphagnum fuscum* on a) solid Knop ME and b) solid Sphagnum medium. I) Capitula of eight independent clones were cut to 5 mm size and transferred to Petri dishes. II) Gametophores after four weeks of cultivation. III) The size of the gametophores was measured by counting the pixels on binary pictures using ImageJ. IV) The area (number of pixels) of each gametophore.

228 The six clones covering the largest area were in descending order 2.2, 1.1, 3.2, 1.2, 2.3 and 3.1 on Knop  
229 ME (**Fig. 3a IV**) and 1.1, 2.2, 2.3, 2.1, 3.2 and 2.5 on Sphagnum medium (**Fig. 3b IV**). Clones 1.1, 2.2, 2.3  
230 and 3.2 were among the six best clones on both media, clones 1.2, 2.1, 2.5 and 3.1 among the six best  
231 clones on one of the plates. In case of ambiguous results, care was taken that at least one clone of  
232 each geographical location remained among the six best clones to maintain the highest possible  
233 ecotype variation. In this way, clones 1.1, 2.1, 2.2, 2.3, 3.1 and 3.2 were identified as the six best clones  
234 on solid media and subsequently analysed in suspension. Here, clone 1.1 yielded significantly more  
235 biomass than the other five clones (**Fig. 4**).

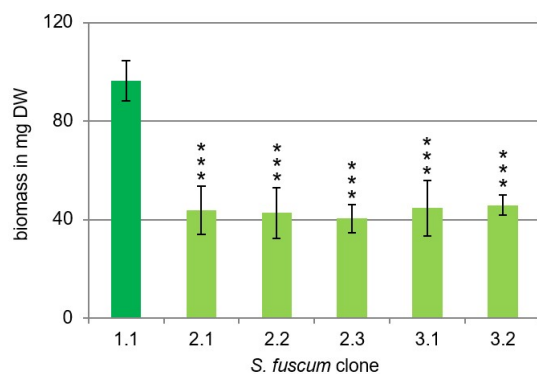

**Fig. 4** Biomass (in mg dry weight) of six *S. fuscum* clones. The growth of the clones was determined in suspension cultures by measuring the dry weight after cultivation of three capitula in flasks containing 50 ml Sphagnum media for six weeks. The y-axis shows the biomass in dry weight, the x-axis shows the clone. Data represent mean values with standard deviations of three biological replicates (ANOVA  $p < 0.0001$ ). Clone 1.1 yielded significantly more biomass compared to the clones 2.1\*\*\*, 2.2\*\*\*, 2.3\*\*\*, 3.1\*\*\* and 3.2\*\*\*. Asterisks represent results of student t-test performed in comparison to clone 1.1 (\*\*\*) ( $p < 0.001$ ).

236 Up to six best-growing clones per species from different sporophytes were deposited in the  
237 International Moss Stock Center (<http://www.moss-stock-center.org>). All deposited clones, their  
238 accession numbers, and the origin of the sporophyte (date of collection, location of collection) are  
239 listed in **Table 1**.

240 The taxonomic status of clones derived from sporophytes originally collected as *S. magellanicum* needs  
241 clarification in future because a new species concept of *S. magellanicum*, *S. medium* and *S. divinum*  
242 became available (Hassel *et al.*, 2018) during the course of our study. We cannot group these clones  
243 into one of these species based on morphology, because it differs slightly between *in-vitro* and the  
244 field, as described for *S. palustre* (Beike *et al.*, 2015). However, we can distinguish them by their  
245 collection site, as geographical distribution differs. Accordingly, our clones most probably are not  
246 *S. magellanicum*, because Hassel *et al.* (2018) suggest its occurrence in Argentina and Chile only. In  
247 contrast, we collected those sporophytes in Sweden and Russia. Therefore, our clones are most likely  
248 *S. divinum* or *S. medium*, because both are circumpolar in the northern hemisphere (Hassel *et al.*,

249 2018). As both species occur in mixed stands (Hassel *et al.*, 2018), we are currently not able to separate  
250 them by collection site either. Therefore, we list these clones here as *S. medium/divinum*. To resolve  
251 this uncertainty in future, a detailed analysis with different molecular markers (Hassel *et al.*, 2018; Di  
252 Palma *et al.*, 2016; von Stackelberg *et al.*, 2006) is needed. However, we note that these clones are  
253 more heterogeneous regarding morphology, colour and growth rate than clones from the other  
254 species in our study. This suggests to the existence of two species in our *S. medium/divinum* collection.  
255 If this hypothesis is confirmed by molecular genetic analyses in future, our axenic *Sphagnum* collection  
256 comprises 20 instead of 19 species.

**Table 1** *Sphagnum* spp. clones in axenic culture with corresponding IMSC numbers, date and location of spore capsule collection.

| Species                  | IMSC No. | 6 best clones                         | Origin of the spore capsule |                                                                     |
|--------------------------|----------|---------------------------------------|-----------------------------|---------------------------------------------------------------------|
|                          |          |                                       | Date                        | Location                                                            |
| <i>S. angustifolium</i>  | 41114    | 2.1, 2.2, 2.3, <b>2.4</b> , 2.5, 7.1  | 2015-07                     | Mālpils (LVA)                                                       |
| <i>S. balticum</i>       | 41118    | 1.1, <b>1.2</b> , 2.2, 3.3, 8.1, 9.5  | 2016-08                     | Lapland (SWE)*                                                      |
| <i>S. capillifolium</i>  | 41126    | 1.2, 1.3, 1.5, <b>1.8</b> , 1.9, 1.49 | 2015-07                     | Freiburg, Schauinsland (DEU)*                                       |
| <i>S. centrale</i>       | 41129    | 1.2, 3.3, 6.4, 7.5                    | 2016-08                     | Siberia, Surgut Polesye (RUS)                                       |
|                          | 41134    | 9.6, <b>10.2</b>                      | 2016-07                     | Mālpils (LVA)                                                       |
| <i>S. compactum</i>      | 41137    | 3.1, 4.6, <b>5.1</b> , 5.3, 6.1, 6.2  | 2018-06                     | Bargerveen (NLD)                                                    |
| <i>S. cuspidatum</i>     | 41146    | 1.1, 1.4, 3.3, 3.4, 5.1, <b>5.2</b>   | 2016-07                     | Gründlenried - Rötseemoos (DEU)*                                    |
| <i>S. fallax</i>         | 41151    | 2.1, 3.1, 4.1, 4.4, <b>4.5</b> , 4.6  | 2017-06                     | Sphagnum farming pilot: Rastede (DEU)<br>Origin: De Werribben (NLD) |
| <i>S. fimbriatum</i>     | 40069    | <b>1.1</b> , 2.1                      | 2012-06                     | Store Mosse (SWE)                                                   |
|                          | 41154    | 6.1, 6.2, 6.4, 6.5                    | 2015-07                     | Mālpils (LVA)                                                       |
| <i>S. fuscum</i>         | 41158    | <b>1.1</b> , 2.1, 2.2, 2.3, 3.1, 3.2  | 2016-08                     | Lapland (SWE)*                                                      |
| <i>S. lindbergii</i>     | 41167    | 2.1, 2.3, 3.1, <b>3.2</b> , 3.3       | 2016-07                     | Lapland (SWE)*                                                      |
| <i>S. medium/divinum</i> | 40066    | 3.1                                   | 2012-07                     | Store Mosse (SWE)                                                   |
|                          | 41169    | 4.1, 4.2, 4.3, 5.1, 5.2               | 2016-08                     | Siberia, Yugra (RUS)                                                |
| <i>S. palustre</i>       | 40068    | 2a, <b>12a</b>                        | 2012-08                     | Lychen-Bohmshof (DEU)                                               |
|                          | 41175    | 4.2, 4.3, 5.1, 5.2                    | 2017-06                     | Sphagnum farming pilot: Rastede (DEU)<br>Origin: De Werribben (NLD) |
| <i>S. papillosum</i>     | 41179    | 1.1, 2.2, 4.3                         | 2016-08                     | Siberia, Potanay Aapa mire (RUS)                                    |
|                          | 41183    | 5.2, <b>6.1</b> , 7.1                 | 2017-06                     | Sphagnum farming pilot: Rastede (DEU)<br>Origin: Ramsloh (DEU)      |
| <i>S. rubellum</i>       | 40067    | <b>1.1</b> , 2.1                      | 2012-06                     | Store Mosse (SWE)                                                   |
| <i>S. russowii</i>       | 41191    | 1.1, 1.2, 3.1, 3.4, 3.5, <b>4.2</b>   | 2016-08                     | Siberia, Chistoye Bog (RUS)                                         |
|                          | 41193    | 2.1, <b>5.2</b> , 5.3, 6.1            | 2016-07                     | Gründlenried - Rötseemoos (DEU)*                                    |
| <i>S. squarrosum</i>     | 41196    | 7.1                                   | 2017-05                     | Buddenhagener Moor (DEU)                                            |
|                          | 41197    | 8.3                                   | 2017-09                     | Steiermark (AUT)                                                    |
| <i>S. subnitens</i>      | 40070    | 1.1                                   | 2012-06                     | Store Mosse (SWE)                                                   |
| <i>S. subfulvum</i>      | 41201    | 4.2, 4.3, 7.2, <b>7.4</b> , 8.1, 8.5  | 2016-08                     | Lapland (SWE)*                                                      |
| <i>S. warnstorffii</i>   | 41208    | 1.3, 1.4, 2.1, 3.3, <b>5.2</b> , 5.4  | 2016-08                     | Siberia, Rangetur Floating mire (RUS)                               |

The six best-growing clones are listed by the number of spore capsule and of the individual clone, respectively. Bold numbers indicate the best-growing clones. The origin of the spore capsule is indicated by date and location of collection. Spore capsules marked with an asterisk (\*) were provided by Michael Lüth, all others by the authors. AUT = Austria, DEU = Germany, LVA = Latvia, NLD = Netherlands, RUS = Russian Federation, SWE = Sweden.

## 257 **Cell-cycle arrest, genome sizes and ploidy**

258 The DNA content of the nuclei (ploidy) can affect productivity, at least in animals and seed plants  
259 (Dhawan & Lavania, 1996; Chen, 2013; Paterson *et al.*, 2012). Usually, *Sphagnum* species have haploid  
260 gametophytes and  $n = 19$  chromosomes, while diploid forms with 38 chromosomes exist. Both  
261 chromosome numbers exist for populations of some species (Cronberg, 1993). Besides chromosome  
262 counting, *Sphagnum* genome sizes were estimated by Feulgen absorbance microscopy (Temsch *et al.*,  
263 1998). Flow cytometry (FCM) was applied to determine DNA contents of mosses (Reski *et al.*, 1994),  
264 including *Sphagnum* (Melosik *et al.*, 2005). The major peak of the internal standard *Physcomitrella*  
265 *patens* represents haploid nuclei in the G2-phase of the cell cycle (Schween *et al.*, 2003a). It was set at  
266 channel 200, whereas the peak at channel 100 represents nuclei in G1. A peak at 400 indicates diploid  
267 nuclei in G2 (Schween *et al.*, 2003a).

268 Our FCM analysis revealed only one peak for gametophytic cells of all 19 *Sphagnum* species, but at two  
269 different positions: Either one peak occurred around 100, or a peak occurred near 200 (**Fig. 5**). As we  
270 analysed fast-growing tissue one might expect that nuclei from one sample were in different phases  
271 of the cell cycle and thus would yield two different peaks (G1 and G2) plus intermediary signals for  
272 nuclei in the S-phase. Our current findings confirm similar findings of Melosik *et al.* (2005) and suggest  
273 that gametophytic cells of all 19 *Sphagnum* species are arrested predominantly either in G1 or G2. A  
274 similar cell-cycle arrest occurs in *P. patens* (Reski *et al.*, 1994; Schween *et al.*, 2003a).

275 In such a situation, FCM cannot clarify if a peak corresponds to G1 or to G2. Thus, a peak at 200 could  
276 result from either haploid nuclei in G2, or diploid nuclei in G1. Thus, we considered the published  
277 genome sizes that are based on sequencing: The basic nuclear DNA content of *P. patens* is 0.53 pg,  
278 with an estimated genome size of 518 megabase pairs (Mbp) (Schween *et al.*, 2003a), while the latest  
279 *P. patens* genome assembly yielded 467.1 Mbp (Lang *et al.*, 2018). Based on Feulgen absorbance  
280 photometry, haploid *Sphagnum* species have DNA contents between 0.392 pg and 0.506 pg, while  
281 diploid species have between 0.814 and 0.952 pg DNA (Temsch *et al.*, 1998) with an average ratio of  
282 1:1.92 between DNA content in haploids and diploids (Melosik *et al.*, 2005). Currently, there is only  
283 one *Sphagnum* genome sequence publicly available. According to this, the *S. fallax* genome comprises  
284 approximately 395 Mbp (<http://phytozome.jgi.doe.gov/>). Assuming that in our FCM analysis peaks at  
285 100 and at 200 represent cells in G1, the estimated genome sizes vary between 370 and 460 Mbp for  
286 the peak at 100 and between 840 and 890 Mbp for the peak at 200. Although these are only  
287 approximations because DAPI binds to AT-rich DNA sequences (Doležel *et al.*, 1992), the values for  
288 those *Sphagnum* species characterised by a peak around 100 coincide well with the size of the *S. fallax*  
289 genome. We therefore conclude that the gametophytic cells of these species are haploid and  
290 predominantly arrested in G1.

291 Although it is an obvious hypothesis that species with a peak around 200 are diploid and arrested in  
292 G1, and not haploid and arrested in G2, we tested this hypothesis by comparison with the literature  
293 about haploidy and diploidy in *Sphagnum* and compiled the data in **Table 2**. Our hypothesis is in  
294 accordance with data for the 13 haploid species *S. angustifolium*, *S. balticum*, *S. capillifolium*,  
295 *S. compactum*, *S. cuspidatum*, *S. fallax*, *S. fuscum*, *S. lindbergii*, *S. medium/divinum*, *S. rubellum*,  
296 *S. subnitens*, *S. subfulvum* and *S. warnstorffii*, as well as the three diploid species *S. centrale*, *S. palustre*  
297 and *S. russowii*. Our *S. fimbriatum* clones, which derive from sporophytes collected in Sweden and  
298 Latvia are haploid. *S. fimbriatum* was reported to be haploid in the USA (Bryan, 1955), Finland (Sorsa,  
299 1955, 1956), Canada (Maass & Harvey, 1973) and Austria (Temsch *et al.*, 1998), whereas diploid  
300 specimens were reported for the UK (Smith & Newton, 1968). Our *S. papillosum* clones established  
301 from sporophytes collected in Russia and Germany are diploid, which is in agreement with material  
302 from the UK (Smith & Newton, 1968) and Austria (Temsch *et al.*, 1998), whereas haploid specimens  
303 were reported from Canada (Maass & Harvey, 1973). Our *S. squarrosom* clones from Germany and  
304 Austria are haploid, like material from Austria (Temsch *et al.*, 1998) and Canada (Maass & Harvey,  
305 1973), whereas diploid specimens were reported from Finland (Sorsa, 1955, 1956).

306 Taken together, we conclude that the gametophytic cells of 19 *Sphagnum* species are predominantly  
307 arrested in G1, at least under our conditions. This contrasts with the G2-arrest of *Physcomitrella patens*  
308 protonemal cells. One prominent feature of *P. patens* is the very high efficiency of homologous  
309 recombination (HR) in these cells. This feature facilitates precise gene targeting (GT) and thus genome  
310 engineering with outstanding efficiency (Schaefer & Zryd, 1997; Strepp *et al.*, 1998; Hohe *et al.*, 2004).  
311 Although it is not yet fully resolved why *P. patens* has such an outstandingly high HR-efficiency, two  
312 hypotheses were put forward early on: either haploidy or the G2-arrest is a prerequisite (Schaefer &  
313 Zryd, 1997; Reski, 1998). These hypotheses can be tested with the collection described here: If haploidy  
314 is sufficient, haploid but not diploid *Sphagnum* species should be amenable to efficient GT. If G2-arrest  
315 is a prerequisite, none of the species described here is amenable to GT. To our knowledge, no genetic  
316 transformation of any *Sphagnum* species was hitherto reported. Because protoplasts derived from  
317 protonemal cells are the preferred target for genetic transformation in *P. patens*, the report about  
318 protonema-induction in *S. squarrosom* (Zhao *et al.*, 2019) paves the way for such experiments in the  
319 future.

**Table 2** The ploidy level of 19 *Sphagnum* species measured by FCM in comparison with the literature

| Species                  | This study<br>FCM | Level of ploidy |                |                |                           |                           |                        |
|--------------------------|-------------------|-----------------|----------------|----------------|---------------------------|---------------------------|------------------------|
|                          |                   | Bryan,<br>1955  | Sorsa,<br>1955 | Sorsa,<br>1956 | Smith and<br>Newton, 1968 | Maass and<br>Harvey, 1973 | Temsch et<br>al., 1998 |
| <i>S. angustifolium</i>  | n                 |                 |                |                |                           |                           | n                      |
| <i>S. balticum</i>       | n                 |                 | n              | n              |                           |                           |                        |
| <i>S. capillifolium</i>  | n                 |                 |                |                |                           |                           | n                      |
| <i>S. centrale</i>       | 2n                |                 |                |                |                           | 2n                        | 2n                     |
| <i>S. compactum</i>      | n                 | n               | n              | n              |                           |                           | n                      |
| <i>S. cuspidatum</i>     | n                 | n               | n              | n              | n                         | n                         | n                      |
| <i>S. fallax</i>         | n                 |                 |                |                |                           |                           | n                      |
| <i>S. fimbriatum</i>     | n                 | n               | n              | n              | 2n                        | n                         | n                      |
| <i>S. fuscum</i>         | n                 |                 | n              | n              |                           | n                         | n                      |
| <i>S. lindbergii</i>     | n                 |                 |                | n              |                           | n                         |                        |
| <i>S. magellanicum</i>   |                   | n               |                | 2n             |                           | n                         | n                      |
| <i>S. medium/divinum</i> | n                 |                 |                |                |                           |                           |                        |
| <i>S. palustre</i>       | 2n                | 2n              |                |                | 2n                        | 2n                        | 2n                     |
| <i>S. papillosum</i>     | 2n                |                 |                |                | 2n                        | n                         | 2n                     |
| <i>S. rubellum</i>       | n                 |                 |                |                | n                         | n                         | n                      |
| <i>S. russowii</i>       | 2n                |                 |                |                |                           |                           | 2n                     |
| <i>S. squarrosum</i>     | n                 |                 | 2n             | 2n             |                           | n                         | n                      |
| <i>S. subnitens</i>      | n                 |                 | n              |                | n                         |                           | n                      |
| <i>S. subfulvum</i>      | n                 |                 |                |                |                           | n                         |                        |
| <i>S. warnstorffii</i>   | n                 |                 | n              | n              |                           |                           | n                      |

Literature data are based on counting chromosome numbers (Bryan, 1955; Sorsa, 1955, 1956; Smith & Newton, 1968; Maass & Harvey, 1973) or on genome size determination with Feulgen absorbance photometry and a scanning cytophotometer (Temsch *et al.*, 1998). n=haploid, 2n=diploid.



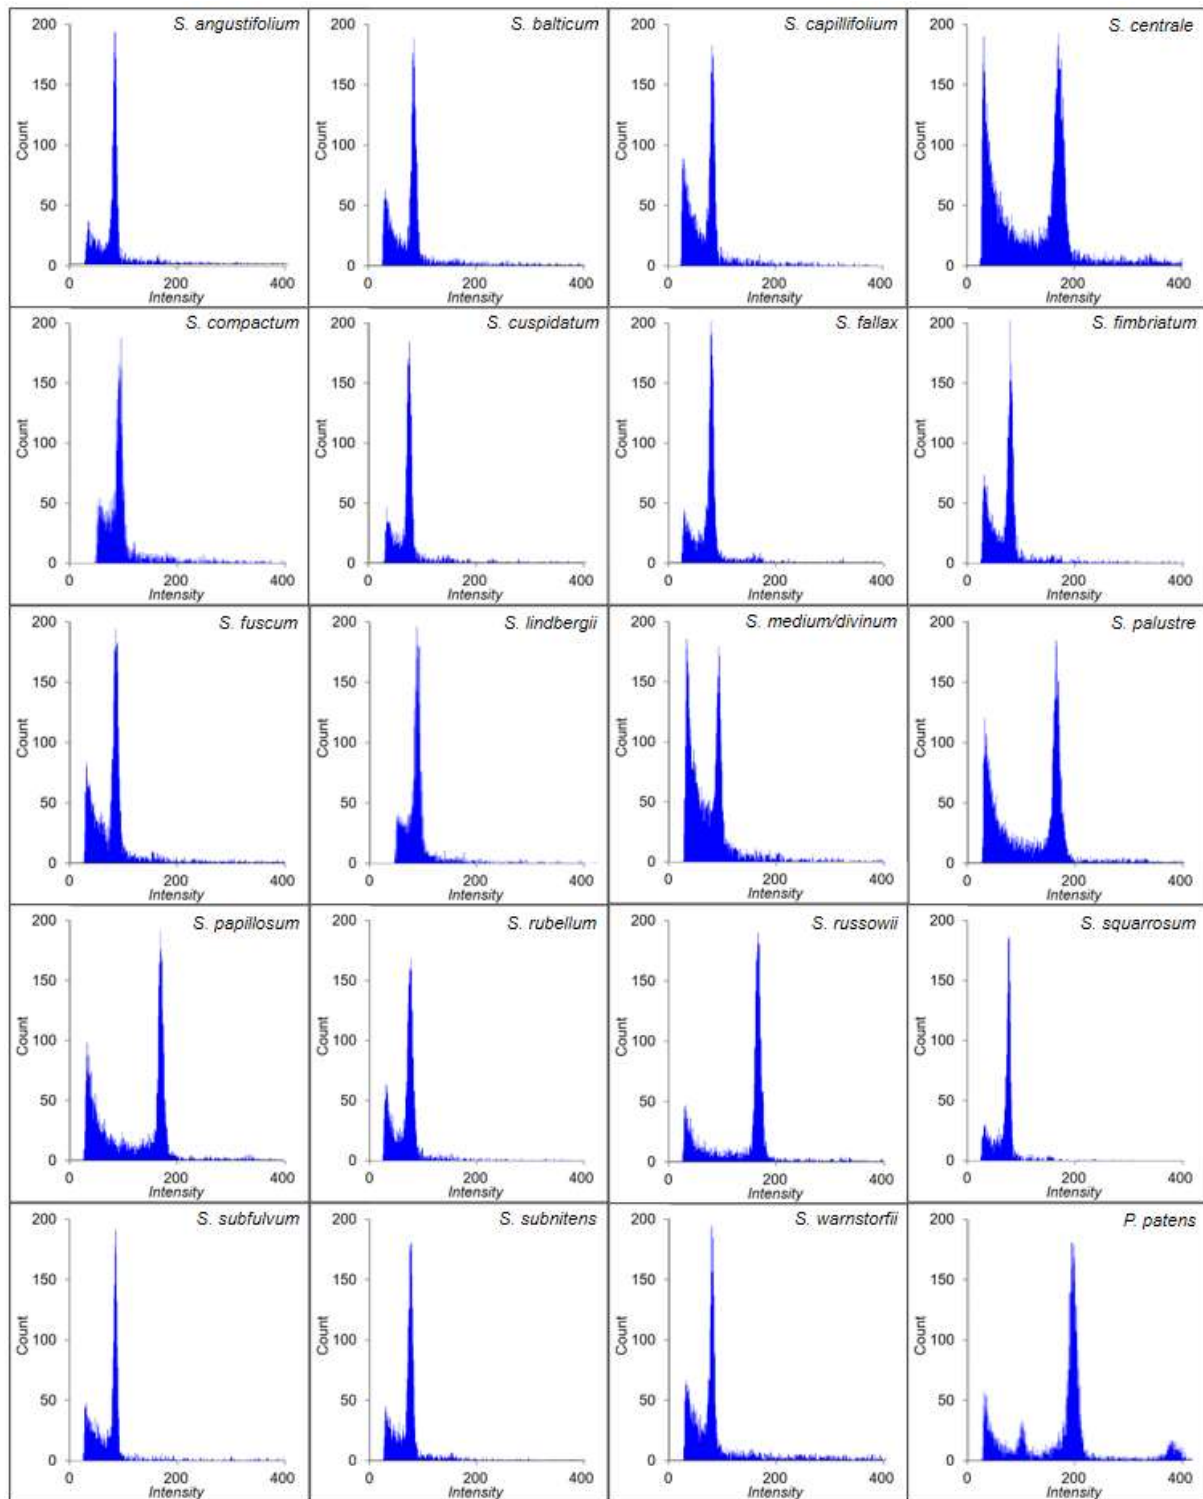

**Fig. 5** Flow-cytometry (FCM) signals of 19 *Sphagnum* species and *Physcomitrella patens* after axenic cultivation on solid Sphagnum medium for four months. *P. patens* was used as internal standard with the major peak set at channel 200. Channel numbers (x-axis) reflect the relative fluorescence intensity of the stained nuclei.

## 320 Growth in suspension

321 Productivity of *Sphagnum* in their natural habitats varies among species with a biomass production of  
322 up to  $1450 \text{ g m}^{-2} \text{ y}^{-1}$  with an average of  $260 \text{ g m}^{-2} \text{ y}^{-1}$ , depending on phylogeny and microhabitat  
323 preferences (Gunnarsson, 2005). To compare productivity without the influence of water level or  
324 nutrient supply, we tested cultivation in suspensions under standardized conditions to identify the  
325 best-growing clone of each of the 19 species (**Fig. 6**). To compare the growth behaviour of the species,  
326 the inocula have to be normalized. Due to the variation of the capitula sizes of *Sphagnum* species (**Fig.**  
327 **2**), the inoculation material had to be adjusted. *In-vitro* cultures facilitate the reproduction due to  
328 vegetative growth, because peat mosses regenerate from several parts of the shoot like capitula,  
329 fascicles, branches and stems, but not from leaves (Poschlod & Pfadenhauer, 1989).  
330 We disrupted gametophores with forceps and filled flasks with 50 mg fresh weight (FW;  $\approx 3.6 \text{ mg DW}$   
331 cf. Beike *et al.*, 2015) and 35 ml *Sphagnum* medium. The nutrient composition was established towards  
332 optimized biomass production of *S. palustre*, but it was not proven for the other established axenic *in-*  
333 *vitro* cultures of *S. fimbriatum*, *S. magellanicum*, *S. rubellum* and *S. subnitens* (Beike *et al.*, 2015).  
334 Under our conditions, biomass increase ranged from 4-fold (*S. rubellum*) up to 80-fold (*S. cuspidatum*)  
335 in six weeks (**Fig. 6**).

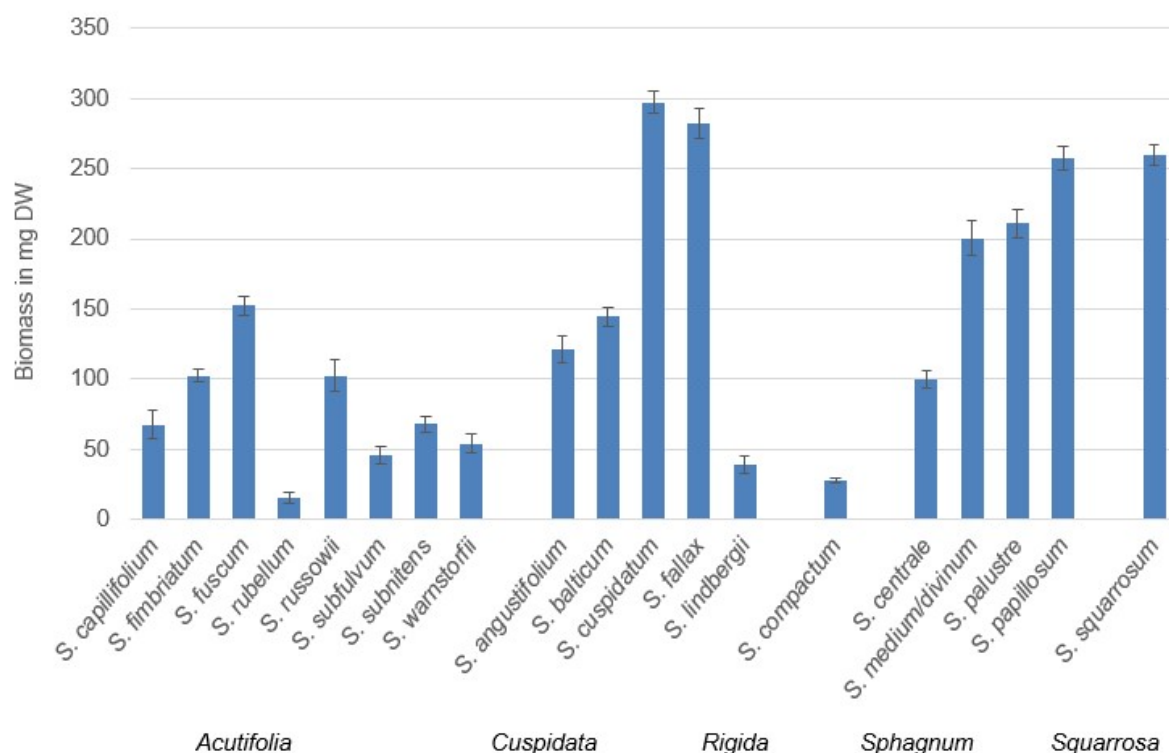

**Fig. 6** Biomass increase of 19 *Sphagnum* species sorted by sections after cultivating 50 mg FW ( $\approx 3.6 \text{ mg DW}$ ) of gametophores in flasks containing 35 ml *Sphagnum* medium for six weeks. The y-axis shows the biomass in mg dry weight, the x-axis shows *Sphagnum* species. Data represent mean values with standard deviations of three biological replicates ( $n=3$ ).

336 The Sphagnum medium was suitable for axenic *in-vitro* cultivation of many *Sphagnum* species,  
337 including *S. cuspidatum* (yielding the largest biomass gain), *S. fallax*, *S. papillosum* and *S. squarrosom*  
338 (**Fig. 6**). The medium seems suboptimal for e.g. *Sphagnum subnitens*, the species with the highest  
339 productivities out of 31 peat-moss species from *Sphagnum*-dominated wetlands (Gunnarsson, 2005).  
340 However, in our study *S. subnitens* had only a weak performance. Gaudig *et al.* (2020) reported that  
341 *S. papillosum*, *S. palustre*, *S. fimbriatum* and *S. fallax* grow well under nutrient-rich conditions with  
342 optimal water supply in a glasshouse experiment. In this study, *S. fallax* had the highest and  
343 *S. papillosum* the lowest productivity at high water level. The good productivity of *S. fimbriatum* in the  
344 glasshouse experiment contrasts with its comparably low productivity in suspension in our study. In  
345 the field, biomass increase is generally largest in pools, less on lawns and least on hummocks (Clymo,  
346 1970), with species growing in ombrotrophic carpets and lawns like *S. balticum*, *S. cuspidatum*,  
347 *S. magellanicum* and *S. rubellum* having higher productivities than hummock species like *S. fuscum*  
348 (Gunnarsson, 2005). This corresponds with several studies, which have shown that the growth rate of  
349 most *Sphagnum* species is highest at water tables just below the capitula, independent of the species  
350 (e.g. Gaudig *et al.*, 2020). Interestingly, we recorded higher growth rates for *S. papillosum* than for *S.*  
351 *palustre* although the opposite is described for natural habitats (Gunnarsson, 2005; Krebs *et al.*, 2016).  
352 Surprisingly, axenic *in-vitro* cultivation enhances the productivity of *S. fuscum*, but impairs the growth  
353 of *S. rubellum*.

354 We could not correlate productivity and taxonomical sections as the four most productive species in  
355 our study belong to three different sections (*Cuspidata*, *Sphagnum*, *Squarrosa*). Species from the  
356 sections *Acutifolia* and *Rigida* had a lower average productivity. In natural habitats, species of the  
357 section *Cuspidata* are more productive than species of the sections *Acutifolia* and *Sphagnum*  
358 (Gunnarsson, 2005). To clarify the differences in productivity on a genetic level between the  
359 taxonomical sections, a larger number of species from one section should be examined in future. Our  
360 inability to detect a correlation between taxonomical sections and biomass gain may reflect the  
361 situation in the field. Piatkowski & Shaw (2019) did not detect an influence of phylogeny on the  
362 majority of traits in their study on 15 *Sphagnum* species and suggest that the environmental context  
363 can obscure the phylogenetic signal. Our novel method creates an artificial but standardized  
364 environment for 19 *Sphagnum* species. It facilitates research to gain deeper insights into the ecology  
365 of peat mosses as single parameters like nutrients and light conditions can be changed and tested.  
366 Recently, Küttim *et al.* (2020) reported on biomass increases of *Sphagnum* species during boreal  
367 winters. Consequently, future studies should also take climate gradients into account.

368 Another genetic property that influences productivity is ploidy (Otto & Whitton, 2000), as described  
369 for many agricultural crops (Henry & Nevo, 2014). In our current study, however, we could not detect  
370 a correlation between ploidy and productivity, because the diploid *S. palustre* and *S. papillosum* were

371 among the six best-growing species, but the haploid *S. cuspidatum* and *S. fallax* were most productive.  
372 The other diploid species *S. centrale* and *S. russowii* yielded an average increase. Because the medium  
373 composition may have affected our results, future studies of haploid and diploid populations of the  
374 same species using individually optimized media may provide better insights into a correlation  
375 between ploidy and yield. Alternatively, genome duplication may have other benefits than pure  
376 biomass increase in *Sphagnum*, or even mosses in general.

### 377 **Summary results of axenic cultivation of 19 *Sphagnum* species**

378 ***Sphagnum angustifolium* (Section *Cuspidata*):** Six clones were obtained from two sporophytes  
379 collected in Latvia. The productivity of clones 2.1, 2.2, 2.3, 2.4, 2.5, and 7.1 in suspension ranged from  
380 34.4±6 mg DW (clone 2.2) to 226.6±7.3 mg DW (clone 2.4). Clone 2.4 yielded significantly more  
381 biomass compared to the other five (Figure S1). All clones are haploid, which is consistent with Temsch  
382 *et al.* (1998).

383 ***Sphagnum balticum* (Section *Cuspidata*):** 16 clones were obtained from six sporophytes collected in  
384 Sweden. Clones 1.1, 1.2, 2.2, 3.3, 8.1 and 9.5 were the six best-growing clones on solid medium.  
385 Growth in suspension resulted in the same productivity for five clones, while clone 1.2 grew more than  
386 twice as fast and yielded significantly more biomass (Figure S2). All clones are haploid, which is  
387 consistent with Sorsa (1955, 1956).

388 ***Sphagnum capillifolium* (Section *Acutifolia*):** 11 clones were obtained from one sporophyte collected  
389 in Germany. Clones 1.2, 1.3, 1.5, 1.8, 1.9 and 1.49 were the six best-growing clones on solid medium.  
390 Growth in suspension ranged from 6.9±0.8 mg DW (clone 1.2) to 45.7±8.2 mg DW (clone 1.8). Clone  
391 1.8 yielded significantly more biomass compared to the other five (Figure S3). All clones are haploid,  
392 which is consistent with Temsch *et al.* (1998).

393 ***Sphagnum centrale* (Section *Sphagnum*):** 14 clones were obtained from seven sporophytes collected  
394 in Russia (clones 1-7) and Latvia (9-10). Clones 1.2, 3.3, 6.4, 7.5, 9.6 and 10.2 were the six best-growing  
395 clones on solid medium. Growth in suspension yielded an average biomass of 119.3±11.4 mg DW,  
396 while clone 10.2 was significantly more productive than the other five (Figure S4). All clones are diploid,  
397 which is consistent with the literature (Temsch *et al.*, 1998; Maass & Harvey, 1973).

398 ***Sphagnum compactum* (Section *Rigida*):** 12 clones were obtained from four sporophytes collected in  
399 the Netherlands. Clones 3.1, 4.6, 5.1, 5.3, 6.1 and 6.2 were the six best-growing clones on solid  
400 medium. Growth in suspension ranged from 4.0±1.8 mg DW (clone 6.2) to 33.2±7.7 mg DW (clone 5.1).  
401 The best-growing clone 5.1 yielded significantly more biomass than clones 3.1, 5.3, 6.1 and 6.2, but  
402 not significantly more than clone 4.6 (Figure S5). All clones are haploid, which is consistent with the  
403 literature (Bryan, 1955; Sorsa, 1955, 1956; Temsch *et al.*, 1998).

404 ***Sphagnum cuspidatum* (Section *Cuspidata*):** 15 clones were obtained from five sporophytes  
405 collected in Germany. Clones 1.1, 1.4, 3.3, 3.4, 5.1 and 5.2 were the six best-growing clones on solid  
406 medium. Growth in suspension ranged from 58.4±4.6 mg DW (clone 3.3) to over 150 mg DW (clones  
407 1.4, 5.2). The best-growing clone 5.2 produced significantly more biomass than clones 1.1, 3.3, 3.4 and  
408 5.1, but not significantly more than clone 1.4 (Figure S6). All clones are haploid, which is consistent  
409 with the literature (Bryan, 1955; Sorsa, 1955, 1956; Smith & Newton, 1968; Maass & Harvey, 1973;  
410 Temsch *et al.*, 1998).

411 ***Sphagnum fallax* (Section *Cuspidata*):** 10 clones were obtained from three sporophytes collected on  
412 a *Sphagnum* farming pilot field in Germany, where in 2011 fragments of a mixture of *Sphagnum* species  
413 collected in the Netherlands were spread out on former bog grassland (Gaudig *et al.*, 2014). Clones  
414 2.1, 3.1, 4.1, 4.4, 4.5 and 4.6 were the six best-growing clones on solid medium. Growth in suspension  
415 ranged from 23.5±5.1 mg DW (clone 2.1) to over twice that amount (clone 4.5). Biomass increase of  
416 the best-growing clone 4.5 was not significantly higher than that of clones 3.1, 4.1, 4.4 and 4.6  
417 (Figure S7). All clones are haploid, which is consistent with Temsch *et al.* (1998).

418 ***Sphagnum fimbriatum* (Section *Acutifolia*):** Six clones were obtained from three sporophytes from  
419 Sweden (1-2) and Latvia (6). The clones 1.1 and 2.1 were established by Beike *et al.* (2015). Growth in  
420 suspension of clones 1.1, 2.1, 6.1, 6.2, 6.4 and 6.5 ranged from 23.9±3.8 mg DW (clone 2.1) to  
421 60.2±3.9 mg DW (clone 1.1). The best-growing clone 1.1 was significantly more productive than clones  
422 2.1, 6.1 and 6.4, but not significantly more than clones 6.2 and 6.5 (Figure S8). All clones are haploid,  
423 which is consistent with Bryan (1955), Sorsa (1955, 1956), Maass & Harvey (1973) and Temsch *et al.*  
424 (1998), but in contrast to Smith & Newton (1968).

425 ***Sphagnum fuscum* (Section *Acutifolia*):** Eight clones were obtained from three sporophytes collected  
426 in Sweden. Clones 1.1, 2.1, 2.2, 2.3, 3.1 and 3.2 were the six best-growing clones on solid medium.  
427 Growth in suspension yielded about the same productivity for five clones, whilst clone 1.1 was  
428 significantly twice as productive (Figure S9). All clones are haploid, which is consistent with the  
429 literature (Sorsa, 1955, 1956; Maass & Harvey, 1973; Temsch *et al.*, 1998).

430 ***Sphagnum lindbergii* (Section *Cuspidata*):** Five clones were obtained from two sporophytes collected  
431 in Germany. Growth in suspension of clones 2.1, 2.3, 3.1, 3.2 and 3.3 yielded from 21.9±1.4 mg DW  
432 (clone 3.3) to over 40 mg DW (clones 2.1, 3.2). The best-growing clone 2.1 was significantly more  
433 productive than clones 2.3 and 3.3, but not significantly more than clones 3.1 and 3.2 (Figure S10). All  
434 clones are haploid, which is consistent with the literature (Sorsa, 1956; Maass & Harvey, 1973).

435 ***Sphagnum medium/divinum* (Section *Sphagnum*):** Eight clones were obtained from four sporophytes  
436 collected in Sweden (1, 3) and Russia (4-5). Clone 3.1 was established as *S. magellanicum* by Beike *et*

437 *al.* (2015). Clones 3.1, 4.1, 4.2, 4.3, 5.1 and 5.2 were the six best-growing clones on solid medium.  
438 Growth in suspension yielded from 28.4±7.1 mg DW (clone 4.3) to twice that amount (clones 3.1 and  
439 4.1). The best-growing clone 3.1 was more productive than clones 4.2, 4.3, 5.1 and 5.2, but not  
440 significantly more than clone 4.1 (Figure S11). All clones are haploid, which is consistent with Bryan  
441 (1955), Maass & Harvey (1973) and Temsch *et al.* (1998) but contrasts Sorsa (1956), who reported  
442 diploid specimens. All these reports named the species *S. magellanicum*.

443 ***Sphagnum palustre* (Section *Sphagnum*):** Nine clones were obtained from three sporophytes collected  
444 from different locations in Germany. Clones 2a and 12a germinated out of one spore capsule  
445 established by Beike *et al.* (2015) under cultivation conditions optimized for clone 12a. Clones 2a, 12a,  
446 4.2, 4.3, 5.1 and 5.2 were the six best-growing clones on solid medium. Suspension culture yielded an  
447 average biomass of 155.5±6.5 mg DW, with clone 12a being most productive, but not significantly  
448 more than clones 4.2, 4.3, 5.1 and 5.2 (Figure S12). All clones are diploid, which is consistent with the  
449 literature (Bryan, 1955; Smith & Newton, 1968; Maass & Harvey, 1973; Temsch *et al.*, 1998).

450 ***Sphagnum papillosum* (Section *Sphagnum*):** 12 clones were obtained from six sporophytes collected  
451 in Russia (1-4) and on a Sphagnum farming field in Rastede, Germany (5-7), established in 2011 from a  
452 mixture of *Sphagnum* species collected in Ramsloh, Germany (Gaudig *et al.*, 2014). Clones 1.1, 2.2, 4.3,  
453 5.2, 6.1 and 7.1 were the six best-growing clones on solid medium. Growth in suspension yielded from  
454 26.1±5.8 mg DW (clone 7.1) to 57.0±10.1 mg DW (clone 6.1). The best-growing clone 6.1 was  
455 significantly more productive than clones 2.2, 4.3, 5.2, and 7.1, but not significantly more than clone  
456 1.1 (Figure S13). All clones are diploid, which is consistent with Smith & Newton (1968) and Temsch *et*  
457 *al.* (1998), whereas Maass & Harvey (1973) reported haploid specimens.

458 ***Sphagnum rubellum* (Section *Acutifolia*):** Two clones were obtained from two sporophytes collected  
459 in Sweden. Clone 1 was selected as best-growing clone, it was established by Beike *et al.* (2015). Both  
460 clones are haploid, which is consistent with the literature (Smith & Newton, 1968; Maass & Harvey,  
461 1973; Temsch *et al.*, 1998).

462 ***Sphagnum russowii* (Section *Acutifolia*):** 12 clones were obtained from three sporophytes collected in  
463 Russia. Clones 1.1, 1.2, 3.1, 3.4, 3.5 and 4.2 were the six best-growing clones on solid medium. Growth  
464 in suspension ranged from 27.9±1.1 mg DW (clone 3.5) to 76.8±12.1 mg DW (clone 4.2). Clone 4.2 was  
465 significantly more productive than the other five (Figure S14). All clones are diploid, which is consistent  
466 with Temsch *et al.* (1998).

467 ***Sphagnum squarrosum* (Section *Squarrosa*):** 16 clones were obtained from six sporophytes collected  
468 in Germany and Austria. Clones 2.1, 5.2, 5.3, 6.1, 7.1 and 8.3 were the six best-growing clones on solid  
469 medium. Growth in suspension yielded an average biomass of 142.9±18.1 mg DW. The best-growing

470 clone 5.2 yielded significantly more biomass than clones 2.1, 5.3, 6.1 and 8.3, but not significantly more  
471 than clone 7.1 (Figure S15). All clones are haploid, which is consistent with Maass & Harvey (1973) and  
472 Temsch *et al.* (1998), but contradicts Sorsa (1955, 1956).

473 ***Sphagnum subfulvum* (Section *Acutifolia*):** 16 clones were obtained from six sporophytes collected in  
474 Sweden. Clones 4.2, 4.3, 7.2, 7.4, 8.1 and 8.5 were the six best-growing clones on solid medium.  
475 Growth in suspension yielded an average biomass of  $13.0 \pm 4.2$  mg DW, with clone 7.4 being the best-  
476 growing clone (Figure S16). All clones are haploid, which is consistent with Maass & Harvey (1973).

477 ***Sphagnum subnitens* (Section *Acutifolia*):** One clone was obtained from a sporophyte collected in  
478 Sweden and was established by Beike *et al.* (2015). It is haploid, which is consistent with the literature  
479 (Sorsa, 1955, 1956; Smith & Newton, 1968; Temsch *et al.*, 1998).

480 ***Sphagnum warnstorffii* (Section *Acutifolia*):** 14 clones were obtained from four sporophytes collected  
481 in Russia. Clones 1.3, 1.4, 2.1, 3.3, 5.2 and 5.4 were the six best-growing clones on solid medium.  
482 Growth in suspension ranged from  $16.1 \pm 4.9$  mg DW (clone 3.5) to  $34.4 \pm 5.4$  mg DW (clone 4.2). The  
483 best-growing clone 5.2 yielded significantly more biomass than clones 1.3 and 2.1, but not significantly  
484 more than clones 1.4, 3.3 and 5.4 (Figure S17). All clones are haploid, which is consistent with the  
485 literature (Sorsa, 1955, 1956; Temsch *et al.*, 1998).

## 486 **Conclusion**

487 Apart from *P. patens* as an established model organism, the development of other model mosses is  
488 inevitable for ecological and evolutionary genomics, as well as clarifying open questions such as the  
489 high HR efficiency of *P. patens*. Due to the large number of peat-moss species and their clear patterns  
490 of niche differentiation, *Sphagnum* provides an exceptional complement (Shaw *et al.*, 2016). Our peat-  
491 moss collection creates a resource for the increasing interest in *Sphagnum* research to establish new  
492 plant model systems. Moreover, the large-scale implementation for diverse applications can rely on  
493 the axenic *in-vitro* cultivation of *Sphagnum* as fast growing high-quality founder material. Scaling up  
494 this cultivation method will facilitate a low cost production process. Especially *Sphagnum* farming will  
495 benefit, as the lack of *Sphagnum* diaspores is one of the biggest problems and their purchase is the  
496 biggest cost factor for establishing *Sphagnum* farming sites (Wichmann *et al.*, 2017, 2020).

497 **Acknowledgements**

498 This work was supported by the German Federal Ministry of Food and Agriculture (BMEL) (MOOSzucht,  
499 No. 22007216). Additional support came from the German Research Foundation (DFG) under  
500 Germany's Excellence Strategy (CIBSS – EXC-2189 – Project ID 390939984; *livMatS* – EXC-2193/1 –  
501 390951807). We gratefully acknowledge Anja Kuberski for expert technical assistance, Michael Lüth  
502 for providing sporophytes, Greta Gaudig for discussion and Anne Katrin Prowse for proofreading of the  
503 manuscript.

504 **Authors contribution**

505 M.A.H., V.M.L., E.L.D. and R.R. planned and designed the research. M.A.H. performed experiments and  
506 analysed data. Ma.K., Mi.K. and A.P. collected sporophytes. M.A.H., E.L.D. and R.R. wrote the  
507 manuscript. H.J. revised this paper. All authors discussed data and approved the final version of the  
508 manuscript.



509 **References**

- 510 **Abel S, Couwenberg J, Dahms T, Joosten H. 2013.** The Database of Potential Paludiculture Plants  
511 (DPPP) and results for Western Pomerania. *Plant Diversity and Evolution* **130**: 219-228.
- 512 **Aboal JR, Concha-Graña E, De Nicola F, Muniategui-Lorenzo S, López-Mahía P, Giordano S, Capozzi F,**  
513 **Di Palma A, Reski R, Zechmeister H, et al. 2020.** Testing a novel biotechnological passive sampler for  
514 monitoring atmospheric PAH pollution. *Journal of Hazardous Materials* **381**: 120949.
- 515 **Beike AK, Spagnuolo V, Lüth V, Steinhart F, Ramos-Gómez J, Krebs M, Adamo P, Rey-Asensio AI,**  
516 **Fernández JA, Giordano S, et al. 2015.** Clonal *in vitro* propagation of peat mosses (*Sphagnum* L.) as  
517 novel green resources for basic and applied research. *Plant Cell, Tissue and Organ Culture* **120**: 1037–  
518 1049.
- 519 **Boon A, Robinson JS, Chadwick DR, Cardenas LM. 2014.** Effect of cattle urine addition on the surface  
520 emissions and subsurface concentrations of greenhouse gases in a UK peat grassland. *Agriculture,*  
521 *Ecosystems & Environment* **186**: 23–32.
- 522 **Bryan VS. 1955.** Chromosome studies in the genus *Sphagnum*. *Bryologist* **58**: 16–39.
- 523 **Caporn SJM, Rosenburgh AE, Keightley AT, Hinde SL, Riggs JL, Buckler M, Wright NA. 2017.** *Sphagnum*  
524 restoration on degraded blanket and raised bogs in the UK using micropropagated source material: a  
525 review of progress. *Mires and Peat* **20**: 09.
- 526 **Capozzi F, Giordano S, Aboal JR, Adamo P, Bargagli R, Boquete T, Di Palma A, Real C, Reski R,**  
527 **Spagnuolo V, et al. 2016.** Best options for the exposure of traditional and innovative moss bags: A  
528 systematic evaluation in three European countries. *Environmental Pollution* **214**: 362–373.
- 529 **Capozzi F, Adamo P, Di Palma A, Aboal JR, Bargagli R, Fernandez JA, Lopez Mahia P, Reski R, Tretiach**  
530 **M, Spagnuolo V, et al. 2017.** *Sphagnum palustre* clone vs native *Pseudoscleropodium purum*: A first  
531 trial in the field to validate the future of the moss bag technique. *Environmental Pollution* **225**: 323–  
532 328.
- 533 **Carlson KM, Gerber JS, Mueller ND, Herrero M, MacDonald GK, Brauman KA, Havlik P, O’Connell CS,**  
534 **Johnson JA, Saatchi S, et al. 2017.** Greenhouse gas emissions intensity of global croplands. *Nature*  
535 *Climate Change* **7**: 63–68.
- 536 **Chen ZJ. 2013.** Genomic and epigenetic insights into the molecular bases of heterosis. *Nature Reviews*  
537 *Genetics* **14**: 471–482.
- 538 **Clymo RS. 1970.** The growth of *Sphagnum*: Methods of measurement. *Journal of Ecology* **58**: 13–49.

- 539 **Clymo RS, Hayward PM. 1982.** The ecology of *Sphagnum*. In: Smith AJE, ed. Bryophyte Ecology.  
540 Dordrecht: Springer Netherlands, 229–289.
- 541 **Couillard D. 1994.** The use of peat in wastewater treatment. *Water Research* **28**: 1261–1274.
- 542 **Cronberg N. 1993.** Reproductive biology of *Sphagnum*. *Lindbergia* **17**: 69–82.
- 543 **Decker EL, Reski R. 2020.** Mosses in biotechnology. *Current Opinion in Biotechnology* **61**: 21–27.
- 544 **Decker EL, Alder A, Hunn S, Ferguson J, Lehtonen MT, Scheler B, Kerres KL, Wiedemann G, Safavi-Rizi**  
545 **V, Nordzieke S, et al. 2017.** Strigolactone biosynthesis is evolutionarily conserved, regulated by  
546 phosphate starvation and contributes to resistance against phytopathogenic fungi in a moss,  
547 *Physcomitrella patens*. *New Phytologist* **216**: 455–468.
- 548 **Dhawan OP, Lavania UC. 1996.** Enhancing the productivity of secondary metabolites via induced  
549 polyploidy: A review. *Euphytica* **87**: 81–89.
- 550 **Di Palma A, Crespo Pardo D, Spagnuolo V, Adamo P, Bargagli R, Cafasso D, Capozzi F, Aboal JR,**  
551 **González AG, Pokrovsky O, et al. 2016.** Molecular and chemical characterization of a *Sphagnum*  
552 *palustre* clone: Key steps towards a standardized and sustainable moss bag technique. *Ecological*  
553 *Indicators* **71**: 388–397.
- 554 **Di Palma A, González AG, Adamo P, Giordano S, Reski R, Pokrovsky OS. 2019.** Biosurface properties  
555 and lead adsorption in a clone of *Sphagnum palustre* (Mosses): Towards a unified protocol of  
556 biomonitoring of airborne heavy metal pollution. *Chemosphere* **236**: 124375.
- 557 **Doležal J, Sgorbati S, Lucretti S. 1992.** Comparison of three DNA fluorochromes for flow cytometric  
558 estimation of nuclear DNA content in plants. *Physiologia Plantarum* **85**: 625–631.
- 559 **Fritz C, Dijk G van, Smolders AJP, Pancotto VA, Elzenga TJTM, Roelofs JGM, Grootjans AP. 2012.**  
560 Nutrient additions in pristine Patagonian *Sphagnum* bog vegetation: can phosphorus addition alleviate  
561 (the effects of) increased nitrogen loads. *Plant Biology* **14**: 491–499.
- 562 **Frolking S, Roulet NT. 2007.** Holocene radiative forcing impact of northern peatland carbon  
563 accumulation and methane emissions. *Global Change Biology* **13**: 1079–1088.
- 564 **Galloway JN, Townsend AR, Erisman JW, Bekunda M, Cai Z, Freney JR, Martinelli LA, Seitzinger SP,**  
565 **Sutton MA. 2008.** Transformation of the nitrogen cycle: recent trends, questions, and potential  
566 solutions. *Science* **320**: 889–892.
- 567 **Gaudig G, Joosten H. 2002.** Peat moss (*Sphagnum*) as a renewable resource - an alternative to  
568 *Sphagnum* peat in horticulture. In: Schmilewski, G. & L. Rochefort (eds.). Peat in horticulture. Quality  
569 and environmental challenges. Jyväskylä, Finland: International Peat Society, 117–125.

- 570 **Gaudig G, Fengler F, Krebs M, Prager A, Schulz J, Wichmann S, Joosten H. 2014.** Sphagnum farming in  
571 Germany – a review of progress. *Mires and Peat* **13**: 08.
- 572 **Gaudig G, Krebs M, Prager A, Wichmann S, Barney M, Caporn SJM, Emmel M, Fritz C, Graf M, Grobe**  
573 **A, et al. 2018.** Sphagnum farming from species selection to the production of growing media: a review.  
574 *Mires and Peat* **20**: 13.
- 575 **Gaudig G, Krebs M, Joosten H. 2020.** *Sphagnum* growth under N-saturation: interactive effects of  
576 water level and P or K fertilisation. *Plant Biology* DOI:10.1111/plb.13092.
- 577 **Gorham E. 1991.** Northern peatlands: Role in the carbon cycle and probable responses to climatic  
578 warming. *Ecological Applications* **1**: 182–195.
- 579 **Graham LE, Kim E, Arancibia-Avila P, Graham JM, Wilcox LW. 2010.** Evolutionary and ecophysiological  
580 significance of sugar utilization by the peat moss *Sphagnum compactum* (Sphagnaceae) and the  
581 common charophycean associates *Cylindrocystis brebissonii* and *Mougeotia* sp. (Zygnemataceae).  
582 *American Journal of Botany* **97**: 1485–1491.
- 583 **Gunnarsson U. 2005.** Global patterns of *Sphagnum* productivity. *Journal of Bryology* **27**: 269–279.
- 584 **Günther A, Jurasinski G, Albrecht K, Gaudig G, Krebs M, Glatzel S. 2017.** Greenhouse gas balance of  
585 an establishing *Sphagnum* culture on a former bog grassland in Germany. *Mires and Peat* **20**: 02.
- 586 **Hassel K, Kyrkjeeide MO, Yousefi N, Prestø T, Stenøien HK, Shaw JA, Flatberg KI. 2018.** *Sphagnum*  
587 *divinum* (sp. nov.) and *S. medium* Limpr. and their relationship to *S. magellanicum* Brid.. *Journal of*  
588 *Bryology* **40**: 197–222.
- 589 **Henry RJ, Nevo E. 2014.** Exploring natural selection to guide breeding for agriculture. *Plant*  
590 *Biotechnology Journal* **12**: 655–662.
- 591 **Hohe A, Egner T, Lucht JM, Holtorf H, Reinhard C, Schween G, Reski R. 2004.** An improved and highly  
592 standardised transformation procedure allows efficient production of single and multiple targeted  
593 gene-knockouts in a moss, *Physcomitrella patens*. *Current Genetics* **44**: 339–347.
- 594 **Joosten H, Clarke D. 2002.** *Wise use of mires and peatlands: Background and principles including a*  
595 *framework for decision-making*. Saarijärvi, Finland: International Mire Conservation Group and  
596 International Peat Society.
- 597 **Joosten H, Sirin A, Couwenberg J, Laine J, Smith P. 2016.** The role of peatlands in climate regulation.  
598 In: Bonn A, Allott T, Evans M, Joosten H, Stoneman R, eds. *Peatland restoration and ecosystem services*.  
599 Cambridge: Cambridge University Press, 63–76.

- 600 **Joosten H, Tanneberger F, Moen A. (Eds.). 2017.** *Mires and peatlands of Europe: Status, distribution*  
601 *and conservation*. Stuttgart, Germany: Schweizerbart Science Publishers.
- 602 **Juan-Ovejero R, Briones MJJ, Öpik M. 2020.** Fungal diversity in peatlands and its contribution to carbon  
603 cycling. *Applied Soil Ecology* **146**: 103393.
- 604 **Kostka JE, Weston DJ, Glass JB, Lilleskov EA, Shaw AJ, Turetsky MR. 2016.** The *Sphagnum* microbiome:  
605 new insights from an ancient plant lineage. *New Phytologist* **211**: 57–64.
- 606 **Krebs M, Gaudig G, Joosten H. 2016.** Record growth of *Sphagnum papillosum* in Georgia  
607 (Transcaucasus): rain frequency, temperature and microhabitat as key drivers in natural bogs. *Mires*  
608 *and Peat* **18**: UNSP 04.
- 609 **Küttim M, Küttim L, Ilomets M, Laine AM. 2020.** Controls of *Sphagnum* growth and the role of winter.  
610 *Ecological Research* **35**: 219–234.
- 611 **Lang D, Ullrich KK, Murat F, Fuchs J, Jenkins J, Haas FB, Piednoel M, Gundlach H, Bel MV, Meyberg R,**  
612 **et al. 2018.** The *Physcomitrella patens* chromosome-scale assembly reveals moss genome structure  
613 and evolution. *Plant Journal* **93**: 515–533.
- 614 **Leifeld J, Wüst-Galley C, Page S. 2019.** Intact and managed peatland soils as a source and sink of GHGs  
615 from 1850 to 2100. *Nature Climate Change* **9**: 945–947.
- 616 **Lew S, Glińska-Lewczuk K, Lew M. 2019.** The effects of environmental parameters on the microbial  
617 activity in peat-bog lakes. *PLoS ONE* **14**.
- 618 **Limpens J, Granath G, Gunnarsson U, Aerts R, Bayley S, Bragazza L, Bubier J, Buttler A, Van L den B,**  
619 **Francez AJ, et al. 2011.** Climatic modifiers of the response to nitrogen deposition in peat-forming  
620 *Sphagnum* mosses: a meta-analysis. *New Phytologist* **191**: 496–507.
- 621 **Maass W, Harvey M. 1973.** Studies on the taxonomy and distribution of *Sphagnum* VII. Chromosome  
622 numbers in *Sphagnum*. *Nova Hedwigia* **24**: 193–205.
- 623 **Melosik I, Odrzykoski II, Śliwińska E. 2005.** Delimitation of taxa of *Sphagnum subsecundum* s.l. (Musci,  
624 Sphagnaceae) based on multienzyme phenotype and cytological characters. *Nova Hedwigia* **80**: 397–  
625 412.
- 626 **Norby RJ, Childs J, Hanson PJ, Warren JM. 2019.** Rapid loss of an ecosystem engineer: *Sphagnum*  
627 decline in an experimentally warmed bog. *Ecology and Evolution* **9**: 12571–12585.
- 628 **Otto SP, Whitton J. 2000.** Polyploid incidence and evolution. *Annual Review of Genetics* **34**: 401–437.

- 629 **Paterson AH, Wendel JF, Gundlach H, Guo H, Jenkins J, Jin D, Llewellyn D, Showmaker KC, Shu S,**  
630 **Udall J, et al. 2012.** Repeated polyploidization of *Gossypium* genomes and the evolution of spinnable  
631 cotton fibres. *Nature* **492**: 423–427.
- 632 **Piatkowski BT, Shaw AJ. 2019.** Functional trait evolution in *Sphagnum* peat mosses and its relationship  
633 to niche construction. *New Phytologist* **223**: 939–949.
- 634 **Poschlod P, Pfadenhauer J. 1989.** Regeneration vegetativer Sprosstelchen von Torfmoosen. Eine  
635 vergleichende Studie an neun *Sphagnum*-Arten. *Telma. Berichte der Deutschen Gesellschaft fuer Moor-*  
636 *und Torfkunde. Hannover* **19**: 77–88.
- 637 **Reski R. 1998.** *Physcomitrella* and *Arabidopsis*: the David and Goliath of reverse genetics. *Trends in*  
638 *Plant Science* **3**: 209–210.
- 639 **Reski R, Abel WO. 1985.** Induction of budding on chloronemata and caulonemata of the moss,  
640 *Physcomitrella patens*, using isopentenyladenine. *Planta* **165**: 354–358.
- 641 **Reski R, Faust M, Wang X-H, Wehe M, Abel WO. 1994.** Genome analysis of the moss *Physcomitrella*  
642 *patens* (Hedw.) B.S.G.. *Molecular and General Genetics* **244**: 352–359.
- 643 **Rewcastle KE, Moore JAM, Henning JA, Mayes MA, Patterson CM, Wang G, Metcalfe DB, Classen AT.**  
644 **2020.** Investigating drivers of microbial activity and respiration in a forested bog. *Pedosphere* **30**: 135–  
645 145.
- 646 **Rudolph H, Kirchhoff M, Gliemann S. 1988.** *Sphagnum* culture techniques. In: Glime JM (ed.),  
647 *Methods in bryology. Proc. Bryol. Meth. Workshop, Mainz. Hattori Bot. Lab., Nichinan*, 25–34.
- 648 **Schaefer DG, Zrýd JP. 1997.** Efficient gene targeting in the moss *Physcomitrella patens*. *Plant Journal*  
649 **11**: 1195–1206.
- 650 **Schween G, Gorr G, Hohe A, Reski R. 2003a.** Unique tissue-specific cell cycle in *Physcomitrella*. *Plant*  
651 *Biology* **5**: 50–58.
- 652 **Schween G, Hohe A, Koprivova R, Reski R. 2003b.** Effects of nutrients, cell density and culture  
653 techniques on protoplast regeneration and early protonema development in a moss, *Physcomitrella*  
654 *patens*. *Journal of Plant Physiology* **160**: 209–212.
- 655 **Shaw AJ, Schmutz J, Devos N, Shu S, Carrell AA, Weston DJ. 2016.** The *Sphagnum* Genome Project. In:  
656 *Advances in Botanical Research. Elsevier*, 167–187.
- 657 **Simola LK. 1969.** The effect of various mono- and disaccharides on the growth of *Sphagnum*  
658 *nemoreum* thalli in sterile cultures. *Physiologia Plantarum* **22**: 1079–1084.

- 659 **Simola LK. 1975.** The effect of several protein amino acids and some inorganic nitrogen sources on the  
660 growth of *Sphagnum nemoreum*. *Physiologia Plantarum* **35**: 194–199.
- 661 **Smith A, Newton M. 1968.** Chromosome studies on some British and Irish mosses. III. *Transactions of*  
662 *the British Bryological Society* **5**: 463–522.
- 663 **Sorsa V. 1955.** Outlines of meiosis in the moss genus *Sphagnum*. *Hereditas* **41**: 250–258.
- 664 **Sorsa V. 1956.** The quadripolar spindle and the change of orientation of the chromosomes in meiosis  
665 of *Sphagnum*. *Annales Academiae Scientiarum Fennicae Series A IV* **33**: 1–63.
- 666 **von Stackelberg M, Rensing SA, Reski R. 2006.** Identification of genic moss SSR markers and a  
667 comparative analysis of twenty-four algal and plant gene indices reveal species-specific rather than  
668 group-specific characteristics of microsatellites. *BMC Plant Biology* **6**: 9.
- 669 **Strepp R, Scholz S, Kruse S, Speth V, Reski R. 1998.** Plant nuclear gene knockout reveals a role in plastid  
670 division for the homolog of the bacterial cell division protein FtsZ, an ancestral tubulin. *Proceedings of*  
671 *the National Academy of Sciences of the United States of America* **95**: 4368–4373.
- 672 **Sundberg S, Rydin H. 2000.** Experimental evidence for a persistent spore bank in *Sphagnum*. *New*  
673 *Phytologist* **148**: 105–116.
- 674 **Temsch EM, Greilhuber J, Krisai R. 1998.** Genome size in *Sphagnum* (peat moss). *Botanica Acta* **111**:  
675 325–330.
- 676 **Van Den Pol-Van Dasselaar A, Van Beusichem ML, Oenema O. 1999.** Methane emissions from wet  
677 grasslands on peat soil in a nature preserve. *Biogeochemistry* **44**: 205–220.
- 678 **Vesty EF, Whitbread AL, Needs S, Tanko W, Jones K, Halliday N, Ghaderiardakani F, Liu X, Cámara M,**  
679 **Coates JC. 2020.** Cross-kingdom signalling regulates spore germination in the moss *Physcomitrella*  
680 *patens*. *Scientific Reports* **10**: 2614.
- 681 **Weston DJ, Turetsky MR, Johnson MG, Granath G, Lindo Z, Belyea LR, Rice SK, Hanson DT, Engelhardt**  
682 **KAM, Schmutz J, et al. 2018.** The Sphagnome Project: enabling ecological and evolutionary insights  
683 through a genus-level sequencing project. *New Phytologist* **217**: 16–25.
- 684 **Wichmann S, Prager A, Gaudig G. 2017.** Establishing *Sphagnum* cultures on bog grassland, cut-over  
685 bogs, and floating mats: procedures, costs and area potential in Germany. *Mires and Peat* **20**: 03.
- 686 **Wichmann S, Krebs M, Kumar S, Gaudig G. 2020.** Paludiculture on former bog grassland: Profitability  
687 of *Sphagnum* farming in North West Germany. *Mires and Peat* **26**: 08.

- 688 **Wichtmann W, Schröder C, Joosten H. (Eds.). 2016.** Paludiculture, productive use of wet peatlands:  
689 climate protection, biodiversity, regional economic benefits. Stuttgart, Germany: Schweizerbart  
690 Science Publishers.
- 691 **Zhao W, Li Z, Hu Y, Wang M, Zheng S, Li Q, Wang Y, Xu L, Li X, Zhu R, et al. 2019.** Development of a  
692 method for protonema proliferation of peat moss (*Sphagnum squarrosum*) through regeneration  
693 analysis. *New Phytologist* **221**: 1160–1171.

### Supplemental Fig. S1

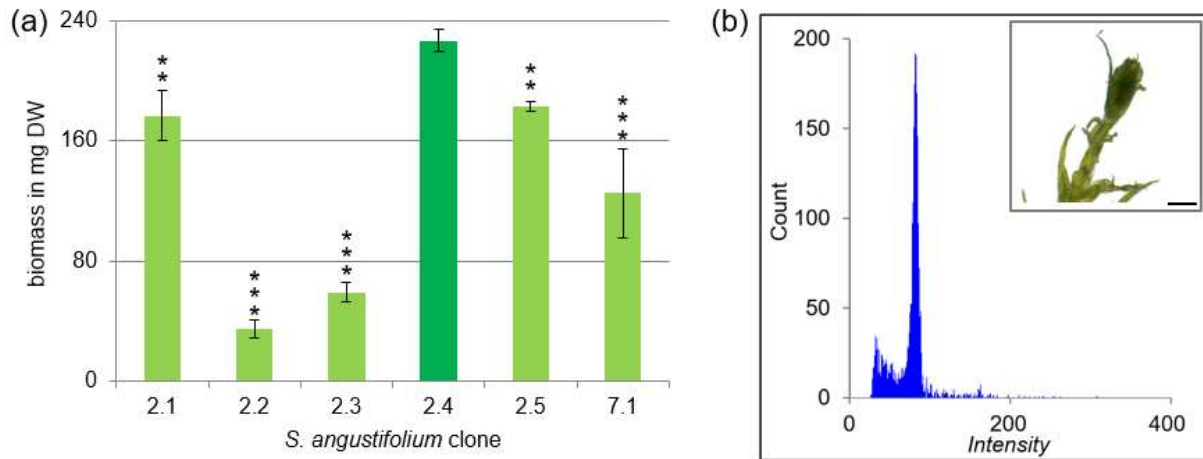

**Fig. S1** Determination of the best-growing clone of *S. angustifolium*. The growth of the six clones (2.1, 2.2, 2.3, 2.4, 2.5 and 7.1) was determined in suspension (a) by measuring the dry weight after cultivation of three capitula in flasks containing 50 ml Sphagnum media for six weeks. The y-axis shows the biomass in mg dry weight, the x-axis shows the clone. Data represents mean values with standard deviations of 3 biological replicates (ANOVA  $p < 0.0001$ ). Clone 2.4 yielded significantly more biomass compared to clones 2.1\*\*, 2.2\*\*\*, 2.3\*\*\*, 2.5\*\* and 7.1\*\*\*. Asterisks represent results of student t-test performed in comparison to clone 2.4. \* =  $p < 0.05$ , \*\* =  $p < 0.01$ , \*\*\* =  $p < 0.001$ . The ploidy of the best-growing clone *S. angustifolium* 2.4 was determined by flow cytometry (FCM). (b) Histograms of gametophore samples measured via FCM after cultivation on solid Sphagnum medium for four months and a picture of *S. angustifolium* gametophore after four weeks (scale bar = 1 mm). The channel numbers corresponding to the relative fluorescence intensities of the analysed particles is shown on the x-axis, the number of counted events is shown on the y-axis.



## Supplemental Fig. S2

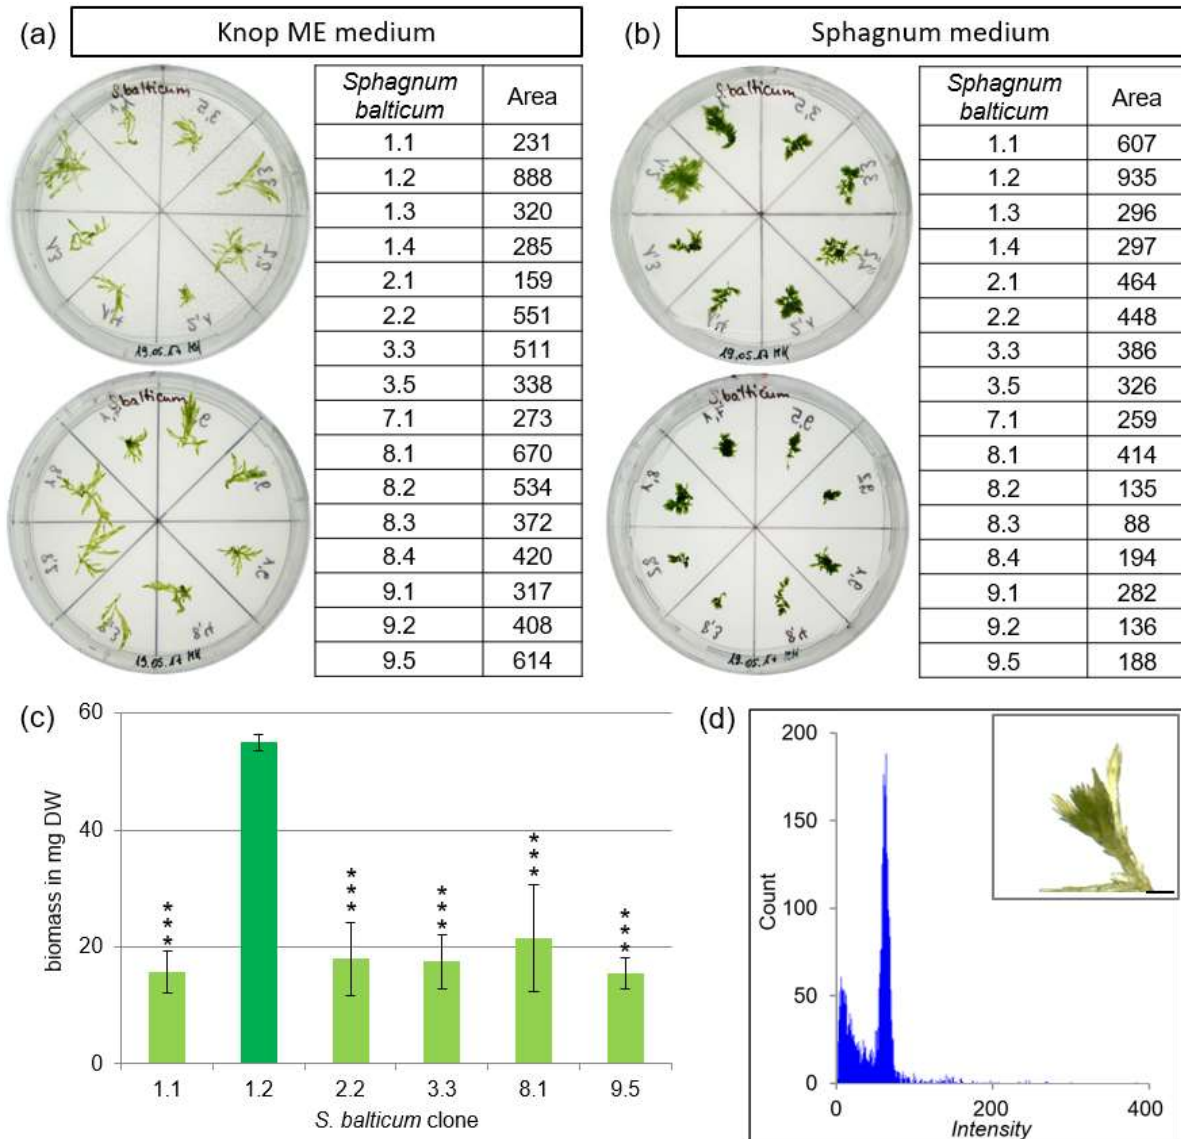

**Fig. S2** Determination of the best-growing clone of *S. balticum*. Growth determination of 16 *S. balticum* clones on (a) solid Knop ME and (b) solid Sphagnum medium after four weeks of cultivation. The following clones were arranged counter-clockwise on the Petri dish: 1.1, 1.2, 1.3, 1.4, 2.1, 2.2, 3.3, 3.5 on upper and 7.1, 8.1, 8.2, 8.3, 8.4, 9.1, 9.2, 9.5 on lower. Gametophores were cultivated for four weeks. The size of the gametophores was measured on the basis of binary pictures using ImageJ and shown in the table next to it. The six best-growing clones (1.1, 1.2, 2.2, 3.3, 8.1 and 9.5) were selected and the growth was determined in suspension (c) by measuring the dry weight after cultivation of three capitula in flasks containing 50 ml Sphagnum media for six weeks. The y-axis shows the biomass in mg dry weight, the x-axis shows the clone. Data represents mean values with standard deviations of 3 biological replicates, except for clone 9.5 (2 replicates) (ANOVA  $p < 0.0001$ ). Clone 1.2 yielded significant more biomass compared to the clones 1.1<sup>\*\*\*</sup>, 2.2<sup>\*\*\*</sup>, 3.3<sup>\*\*\*</sup>, 8.1<sup>\*\*\*</sup> and 9.5<sup>\*\*\*</sup>. Asterisks represent results of student t-test performed in comparison to clone 1.2. \* =  $p < 0.05$ , \*\* =  $p < 0.01$ , \*\*\* =  $p < 0.001$ . The ploidy of the best-growing clone *S. balticum* 1.2 was determined by flow cytometry (FCM). (d) Histograms of gametophore samples measured via FCM after cultivation on solid Sphagnum medium for four months and a picture of *S. balticum* gametophore after four weeks (scale bar = 1 mm). The channel numbers corresponding to the relative fluorescence intensities of the analysed particles is shown on the x-axis, the number of counted events is shown on the y-axis.

### Supplemental Fig. S3

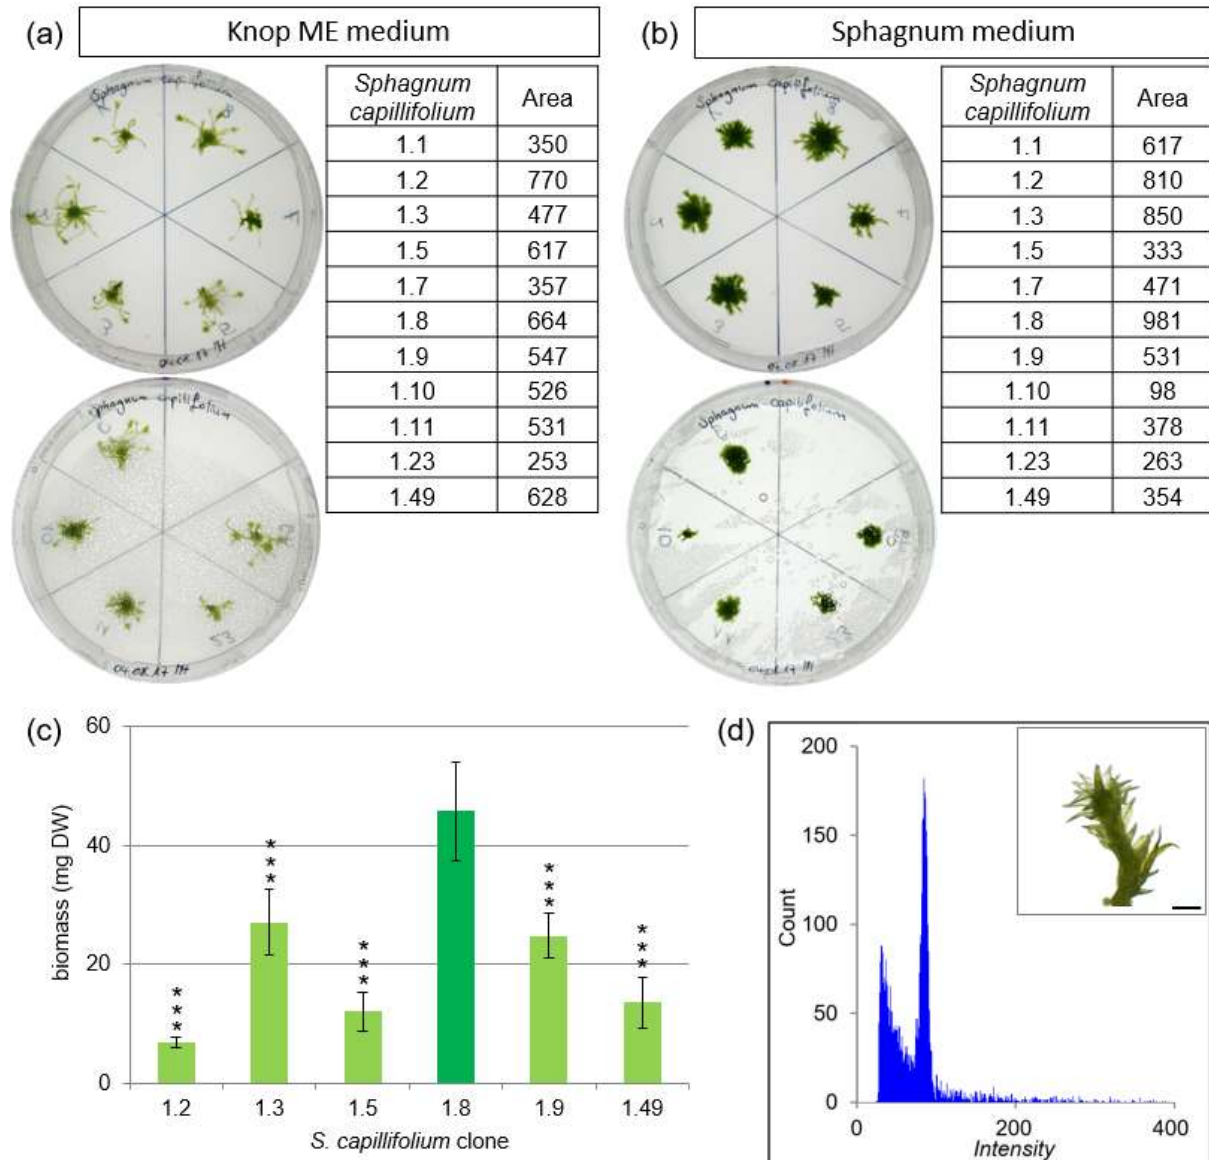

**Fig. S3** Determination of the best-growing clone of *S. capillifolium*. Growth determination of 11 *S. capillifolium* clones on (a) solid Knop ME and (b) solid Sphagnum medium after four weeks of cultivation. The following clones were arranged counter-clockwise on the Petri dish: 1.1, 1.2, 1.3, 1.5, 1.7, 1.8 on upper and 1.9, 1.10, 1.11, 1.23, 1.49 on lower. Gametophores were cultivated for four weeks. The size of the gametophores was measured on the basis of binary pictures using ImageJ and shown in the table next to it. The six best-growing clones (1.2, 1.3, 1.5, 1.8, 1.9 and 1.49) were selected and the growth was determined in suspension (c) by measuring the dry weight after cultivation of three capitula in flasks containing 50 ml Sphagnum media for six weeks. The y-axis shows the biomass in mg dry weight, the x-axis shows the clone. Data represents mean values with standard deviations of 3 biological replicates (ANOVA  $p < 0.0001$ ). Clone 1.8 yielded significant more biomass compared to the clones 1.2\*\*\*, 1.3\*\*\*, 1.5\*\*\*, 1.9\*\*\* and 1.49\*\*\*. Asterisks represent results of student t-test performed in comparison to clone 1.8. \* =  $p < 0.05$ , \*\* =  $p < 0.01$ , \*\*\* =  $p < 0.001$ . The ploidy of the best-growing clone *S. capillifolium* 1.8 was determined by flow cytometry (FCM). (d) Histograms of gametophore samples measured via FCM after cultivation on solid Sphagnum medium for four months and a picture of *S. capillifolium* gametophore after four weeks (scale bar = 1 mm). The channel numbers corresponding to the relative fluorescence intensities of the analysed particles is shown on the x-axis, the number of counted events is shown on the y-axis.

Supplemental Fig. S4

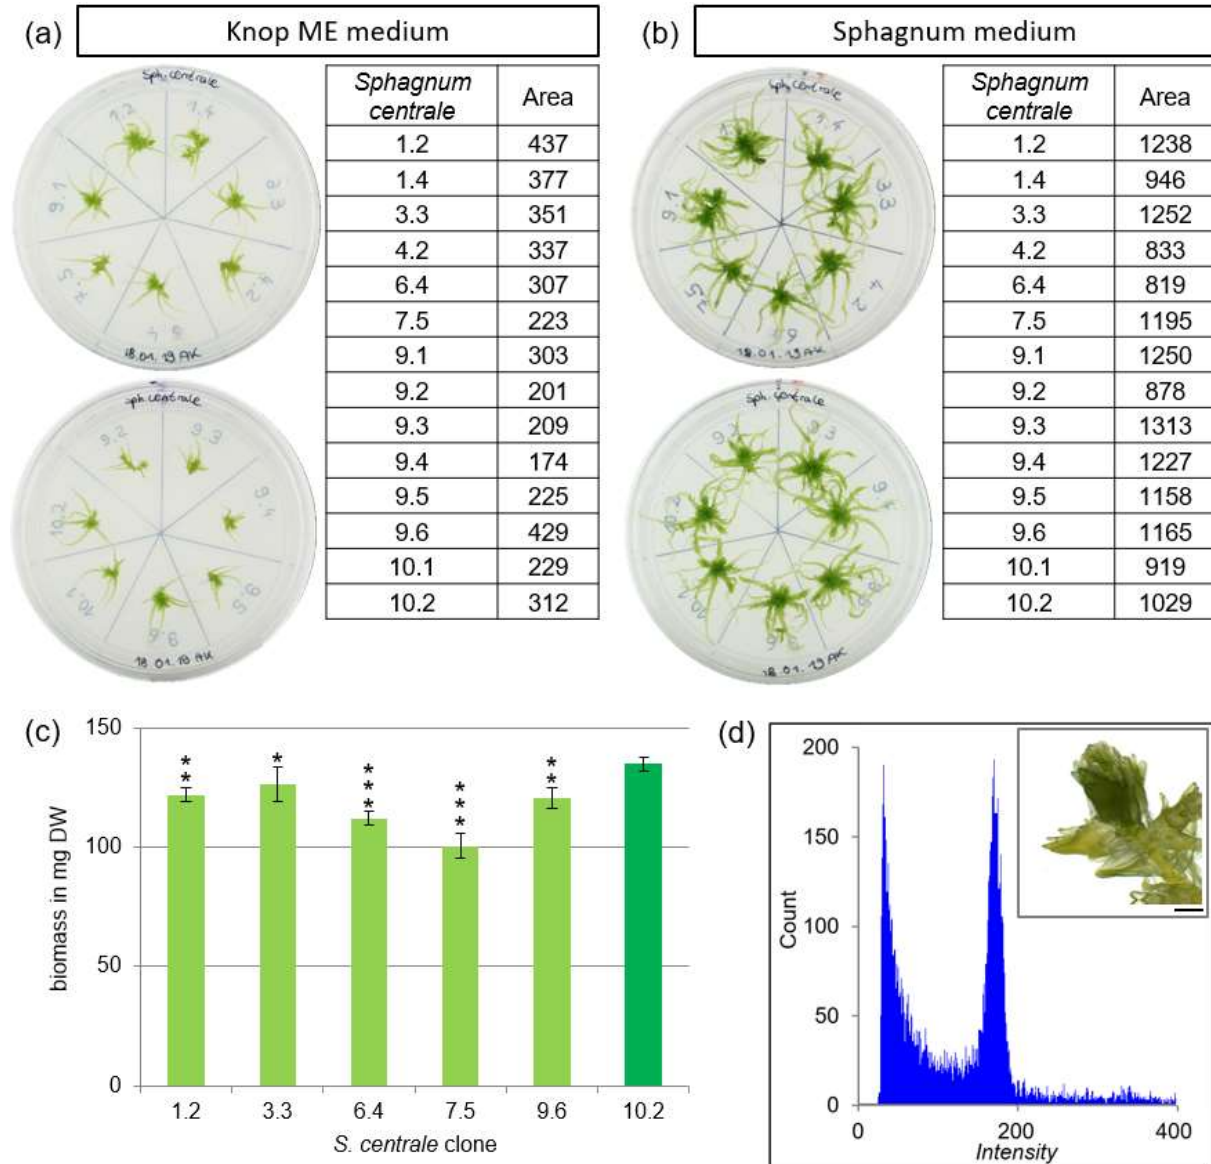

**Fig. S4** Determination of the best-growing clone of *S. centrale*. Growth determination of 14 *S. centrale* clones on (a) solid Knop ME and (b) solid Sphagnum medium after four weeks of cultivation. The following clones were arranged clockwise on the Petri dish: 1.2, 1.4, 3.3, 4.2, 6.4, 7.5, 9.1 on upper and 9.2, 9.3, 9.4, 9.5, 9.6, 10.1, 10.2 on lower. Gametophores were cultivated for four weeks. The size of the gametophores was measured on the basis of binary pictures using ImageJ and shown in the table next to it. The six best-growing clones (1.2, 3.3, 6.4, 7.5, 9.6 and 10.2) were selected and the growth was determined in suspension (c) by measuring the dry weight after cultivation of three capitula in flasks containing 50 ml Sphagnum media for six weeks. The y-axis shows the biomass in mg dry weight, the x-axis shows the clone. Data represents mean values with standard deviations of 3 biological replicates (ANOVA  $p < 0.0001$ ). Clone 10.2 yielded significant more biomass compared to the clones 1.2\*\*, 3.3\*, 6.4\*\*\*, 7.5\*\*\* and 9.6\*\*. Asterisks represent results of student t-test performed in comparison to clone 10.2. \* =  $p < 0.05$ , \*\* =  $p < 0.01$ , \*\*\* =  $p < 0.001$ . The ploidy of the best-growing clone *S. centrale* 10.2 was determined by flow cytometry (FCM). (d) Histograms of gametophore samples measured via FCM after cultivation on solid Sphagnum medium for four months and a picture of *S. centrale* gametophore after four weeks (scale bar = 1 mm). The channel numbers corresponding to the relative fluorescence intensities of the analysed particles is shown on the x-axis, the number of counted events is shown on the y-axis.

## Supplemental Fig. S5

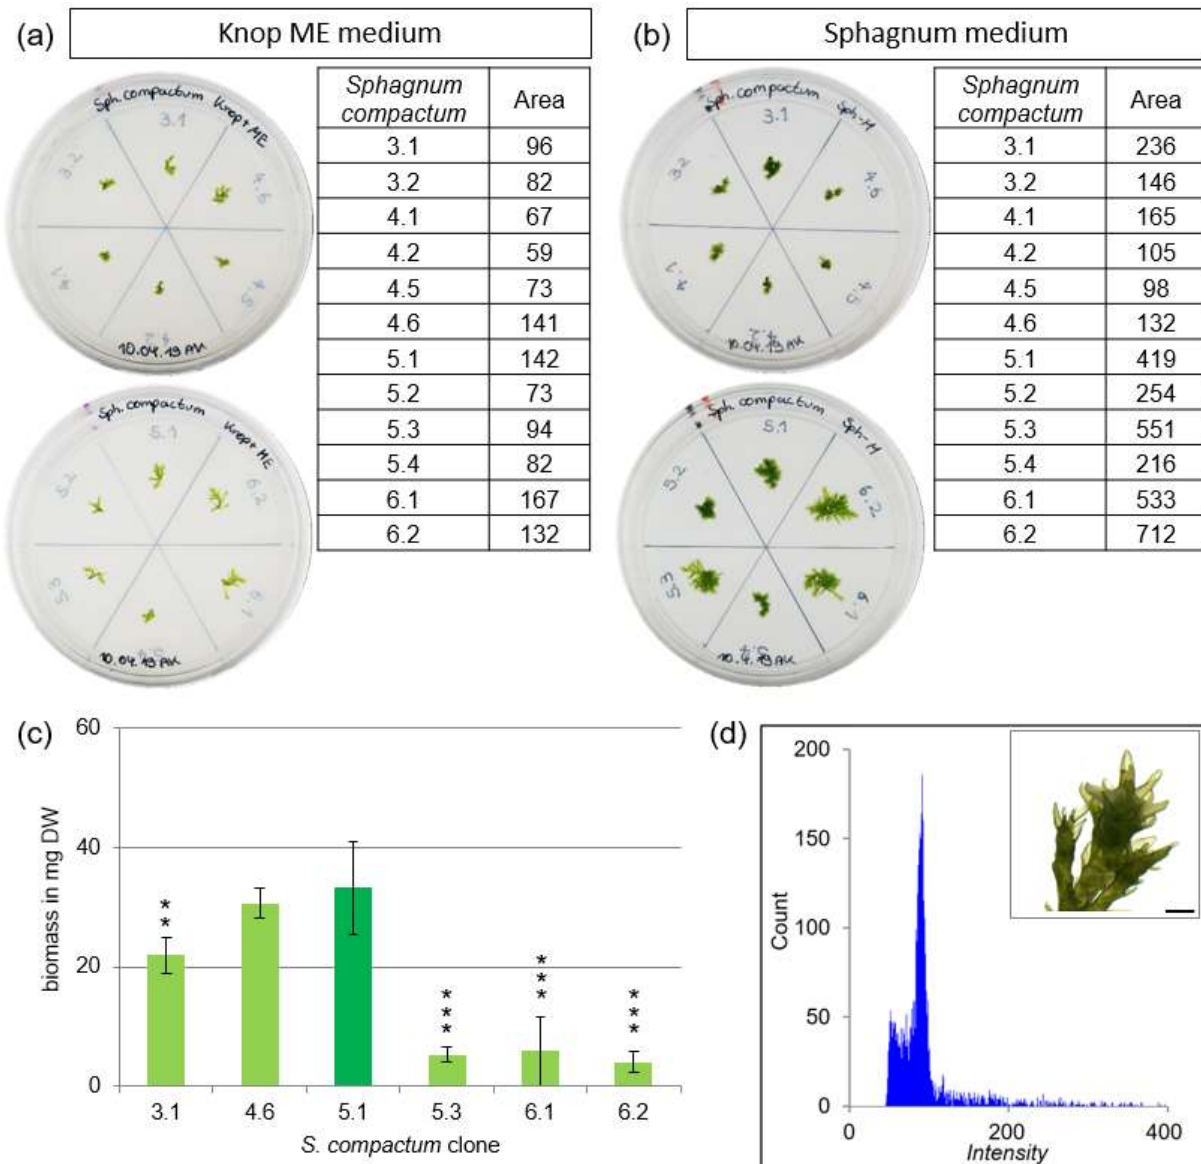

**Fig. S5** Determination of the best-growing clone of *S. compactum*. Growth determination of 12 *S. compactum* clones on (a) solid Knop ME and (b) solid Sphagnum medium after four weeks of cultivation. The following clones were arranged counter-clockwise on the Petri dish: 3.1, 3.2, 4.1, 4.2, 4.5, 4.6 on upper and 5.1, 5.2, 5.3, 5.4, 6.1, 6.2 on lower. Gametophores were cultivated for four weeks. The size of the gametophores was measured on the basis of binary pictures using ImageJ and shown in the table next to it. The six best-growing clones (3.1, 4.6, 5.1, 5.3, 6.1 and 6.2) were selected and the growth was determined in suspension (c) by measuring the dry weight after cultivation of three capitula in flasks containing 50 ml Sphagnum media for six weeks. The y-axis shows the biomass in mg dry weight, the x-axis shows the clone. Data represents mean values with standard deviations of 3 biological replicates (ANOVA  $p < 0.0001$ ). Clone 5.1 yielded significant more biomass compared to the clones 3.1\*\*, 5.3\*\*\*, 6.1\*\*\* and 6.2\*\*\*. Asterisks represent results of student t-test performed in comparison to clone 5.1. \* =  $p < 0.05$ , \*\* =  $p < 0.01$ , \*\*\* =  $p < 0.001$ . The ploidy of the best-growing clone *S. compactum* 5.1 was determined by flow cytometry (FCM). (d) Histograms of gametophore samples measured via FCM after cultivation on solid Sphagnum medium for four months and a picture of *S. compactum* gametophore after four weeks (scale bar = 1 mm). The channel numbers corresponding to the relative fluorescence intensities of the analysed particles is shown on the x-axis, the number of counted events is shown on the y-axis.

Supplemental Fig. S6

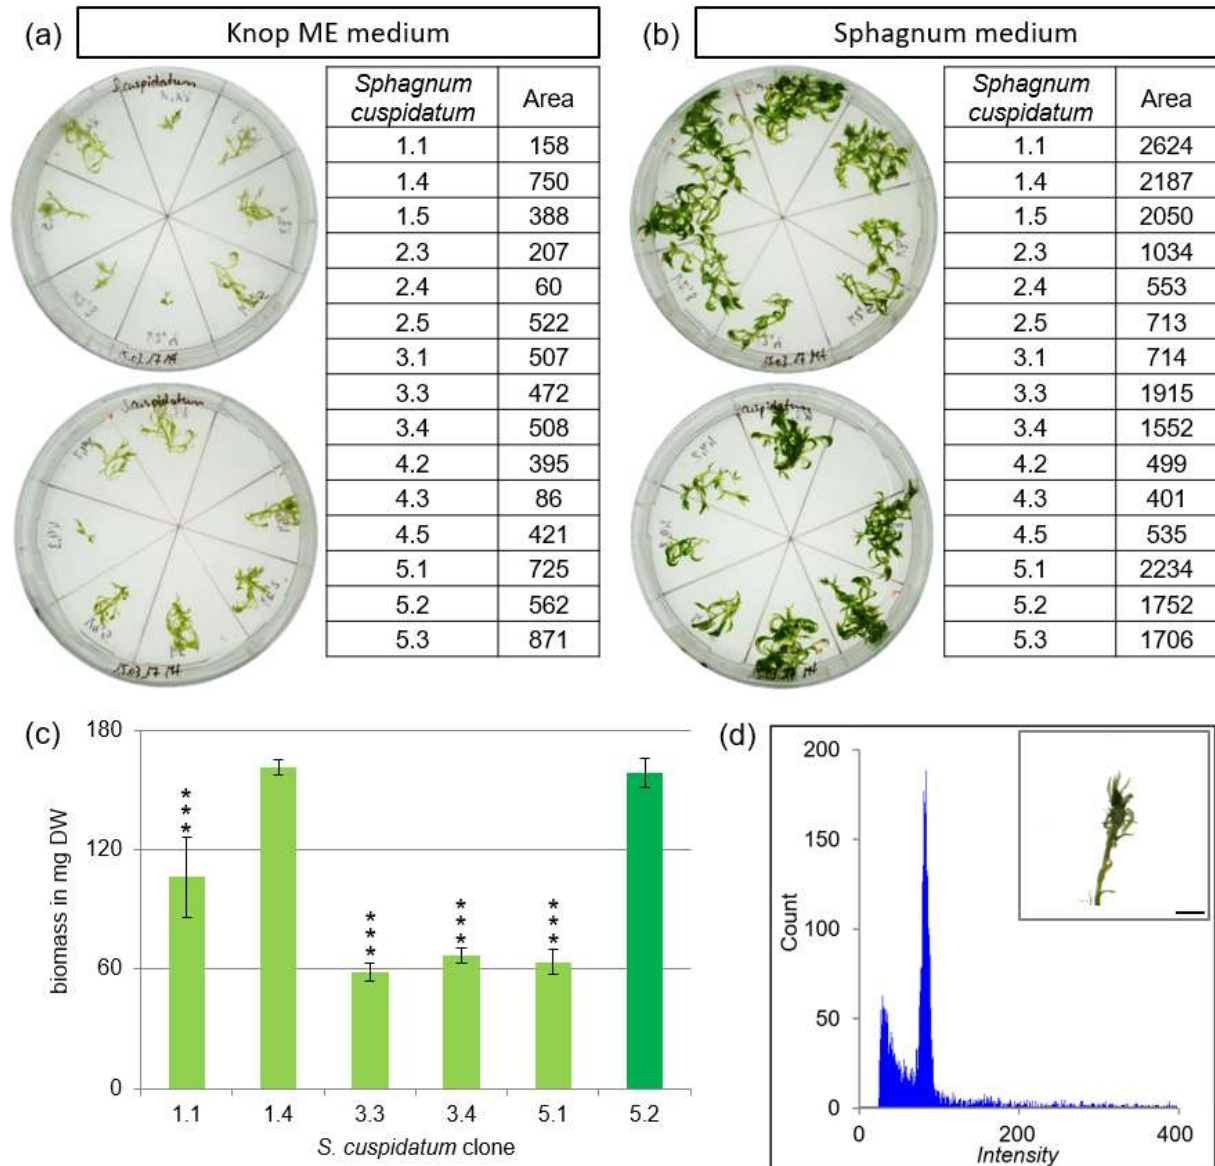

**Fig. S6** Determination of the best-growing clone of *S. cuspidatum*. Growth determination of 15 *S. cuspidatum* clones on (a) solid Knop ME and (b) solid Sphagnum medium after four weeks of cultivation. The following clones were arranged counter-clockwise on the Petri dish: 1.1, 1.4, 1.5, 2.3, 2.4, 2.5, 3.1, 3.3 on upper and 3.4, 4.2, 4.3, 4.5, 5.1, 5.2, 5.3 on lower. Gametophores were cultivated for four weeks. The size of the gametophores was measured on the basis of binary pictures using ImageJ and shown in the table next to it. The six best-growing clones (1.1, 1.4, 3.3, 3.4, 5.1 and 5.2) were selected and the growth was determined in suspension (c) by measuring the dry weight after cultivation of three capitula in flasks containing 50 ml Sphagnum media for six weeks. The y-axis shows the biomass in mg dry weight, the x-axis shows the clone. Data represents mean values with standard deviations of 3 biological replicates, except for clone 1.4 (2 replicates) (ANOVA  $p < 0.0001$ ). Clone 5.2 yielded more biomass compared to the clones 1.1<sup>\*\*\*</sup>, 3.3<sup>\*\*\*</sup>, 3.4<sup>\*\*\*</sup>, 5.1<sup>\*\*\*</sup>, but the biomass increase is not significantly better than for clone 5.2. Asterisks represent results of student t-test performed in comparison to clone 2.4. \* =  $p < 0.05$ , \*\* =  $p < 0.01$ , \*\*\* =  $p < 0.001$ . The ploidy of the best-growing clone *S. cuspidatum* 5.2 was determined by flow cytometry (FCM). (d) Histograms of gametophore samples measured via FCM after cultivation on solid Sphagnum medium for four months and a picture of *S. cuspidatum* gametophore after four weeks (scale bar = 1 mm). The channel numbers corresponding to the relative fluorescence intensities of the analysed particles is shown on the x-axis, the number of counted events is shown on the y-axis.

## Supplemental Fig. S7

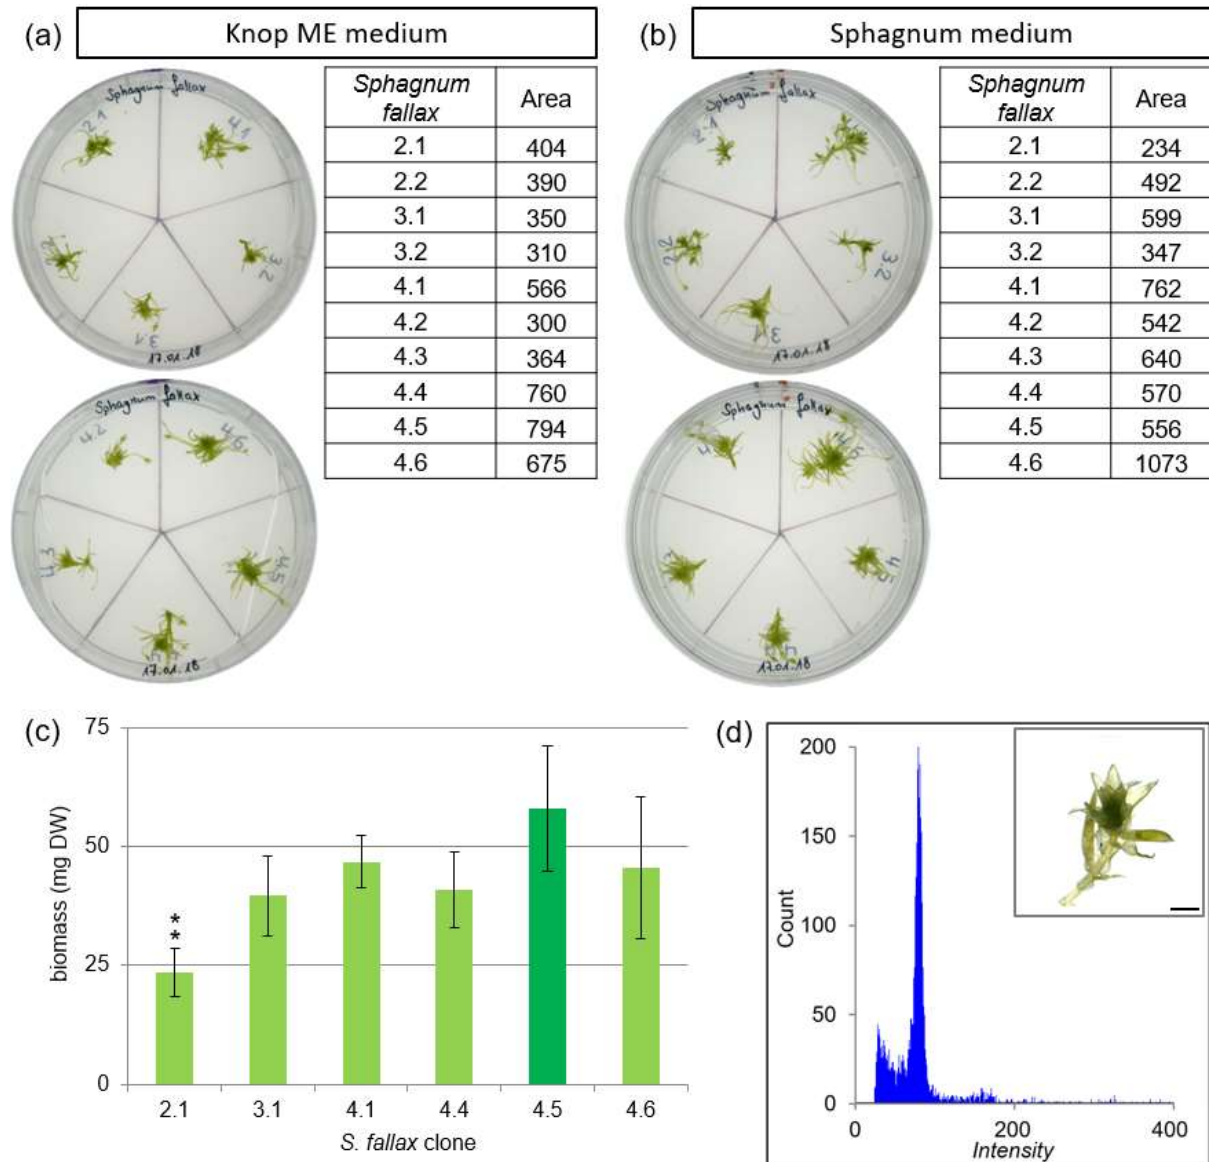

**Fig. S7** Determination of the best-growing clone of *S. fallax*. Growth determination of 10 *S. fallax* clones on (a) solid Knop ME and (b) solid Sphagnum medium after four weeks of cultivation. The following clones were arranged counter-clockwise on the Petri dish: 2.1, 2.2, 3.1, 3.2, 4.1 on upper and 4.2, 4.3, 4.4, 4.5, 4.6 on lower. Gametophores were cultivated for four weeks. The size of the gametophores was measured on the basis of binary pictures using ImageJ and shown in the table next to it. The six best-growing clones (2.1, 3.1, 4.1, 4.4, 4.5 and 4.6) were selected and the growth was determined in suspension (c) by measuring the dry weight after cultivation of three capitula in flasks containing 50 ml Sphagnum media for six weeks. The y-axis shows the biomass in mg dry weight, the x-axis shows the clone. Data represents mean values with standard deviations of 3 biological replicates, except for clone 4.5 (2 replicates) (ANOVA  $p < 0.05$ ). Clone 4.5 yielded more biomass compared to clone 2.1\*\*, but the biomass increase is not significantly better than for the clones 3.1, 4.1, 4.4 and 4.6. Asterisks represent results of student t-test performed in comparison to clone 4.5. \* =  $p < 0.05$ , \*\* =  $p < 0.01$ , \*\*\* =  $p < 0.001$ . The ploidy of the best-growing clone *S. fallax* 4.5 was determined by flow cytometry (FCM). (d) Histograms of gametophore samples measured via FCM after cultivation on solid Sphagnum medium for four months and a picture of *S. fallax* gametophore after four weeks (scale bar = 1 mm). The channel numbers corresponding to the relative fluorescence intensities of the analysed particles is shown on the x-axis, the number of counted events is shown on the y-axis.

### Supplemental Fig. S8

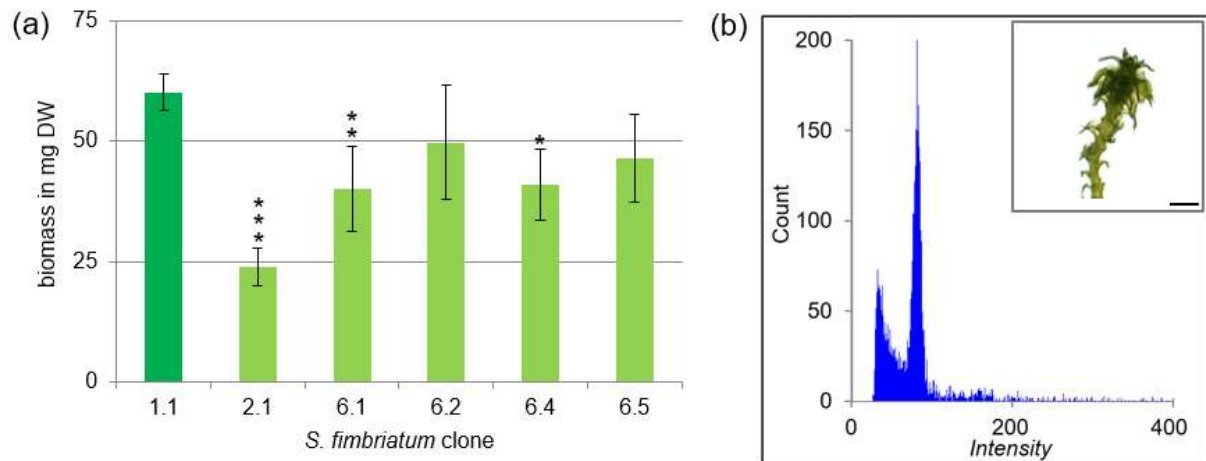

**Fig. S8** Determination of the best-growing clone of *S. fimbriatum*. The growth of the six clones (1.1, 2.1, 6.1, 6.2, 6.4 and 6.5) was determined in suspension (a) by measuring the dry weight after cultivation of three capitula in flasks containing 50 ml Sphagnum media for six weeks. The y-axis shows the biomass in mg dry weight, the x-axis shows the clone. Data represents mean values with standard deviations of 3 biological replicates (ANOVA  $p < 0.05$ ). Clone 1.1 yielded more biomass compared to the clones 2.1\*\*\*, 6.1\*\* and 6.4\*, but the biomass increase is not significantly better than for clone 6.2 and 6.5. Asterisks represent results of student t-test performed in comparison to clone 1.1. \* =  $p < 0.05$ , \*\* =  $p < 0.01$ , \*\*\* =  $p < 0.001$ . The ploidy of the best-growing clone *S. fimbriatum* 1.1 was determined by flow cytometry (FCM). (b) Histograms of gametophore samples measured via FCM after cultivation on solid Sphagnum medium for four months and a picture of *S. fimbriatum* gametophore after four weeks (scale bar = 1 mm). The channel numbers corresponding to the relative fluorescence intensities of the analysed particles is shown on the x-axis, the number of counted events is shown on the y-axis.

**Supplemental Fig. S9**

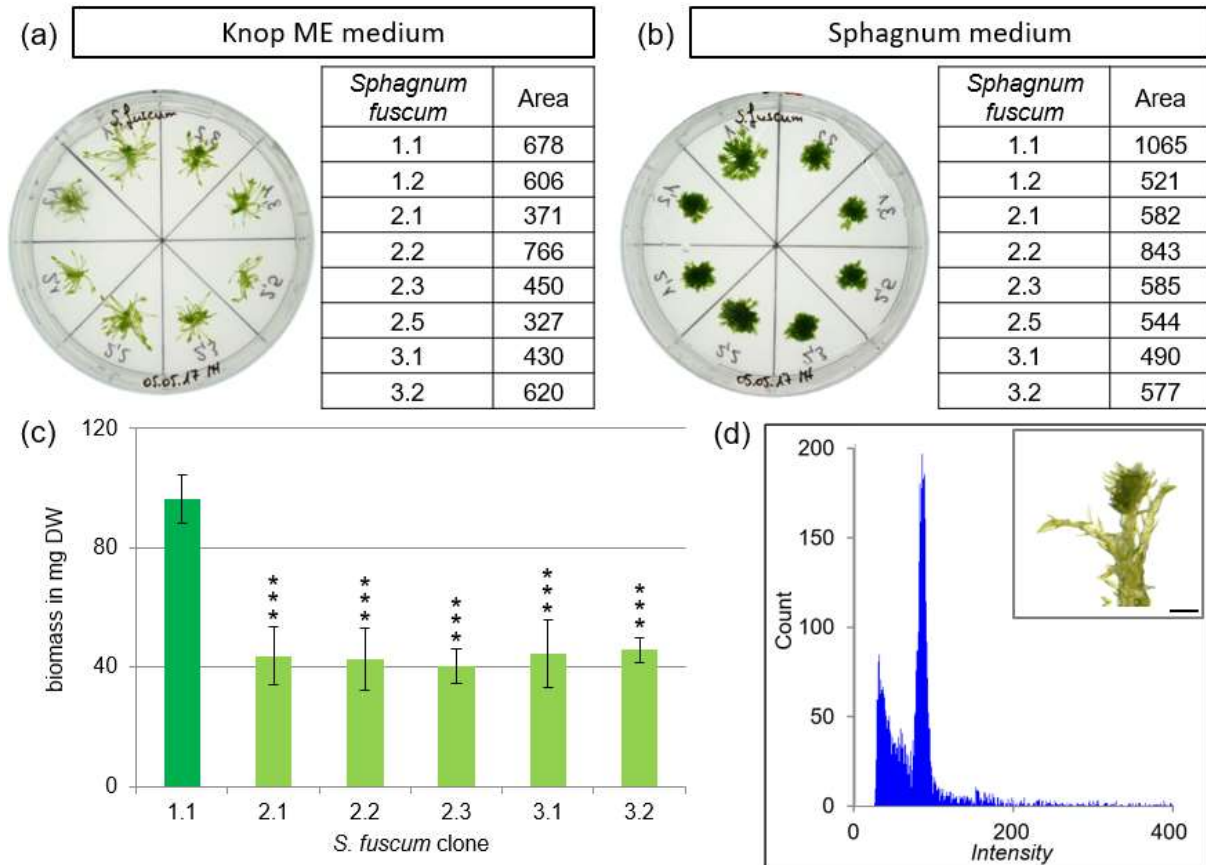

**Fig. S9** Determination of the best-growing clone of *S. fuscum*. Growth determination of eight *S. fuscum* clones on (a) solid Knop ME and (b) solid Sphagnum medium after four weeks of cultivation. The following clones were arranged counter-clockwise on the Petri dish: 1.1, 1.2, 2.1, 2.2, 2.3, 2.5, 3.1, 3.2. Gametophores were cultivated for four weeks. The size of the gametophores was measured on the basis of binary pictures using ImageJ and shown in the table next to it. The six best-growing clones (1.1, 2.1, 2.2, 2.3, 3.1 and 3.2) were selected and the growth was determined in suspension (c) by measuring the dry weight after cultivation of three capitula in flasks containing 50 ml Sphagnum media for six weeks. The y-axis shows the biomass in mg dry weight, the x-axis shows the clone. Data represents mean values with standard deviations of 3 biological replicates (ANOVA  $p < 0.0001$ ). Clone 1.1 yielded significantly more biomass compared to the clones 2.1\*\*\*, 2.2\*\*\*, 2.3\*\*\*, 3.1\*\*\* and 3.2\*\*\*. Asterisks represent results of student t-test performed in comparison to clone 1.1. \* =  $p < 0.05$ , \*\* =  $p < 0.01$ , \*\*\* =  $p < 0.001$ . The ploidy of the best-growing clone *S. fuscum* 1.1 was determined by flow cytometry (FCM). (d) Histograms of gametophore samples measured via FCM after cultivation on solid Sphagnum medium for four months and a picture of *S. fuscum* gametophore after four weeks (scale bar = 1 mm). The channel numbers corresponding to the relative fluorescence intensities of the analysed particles is shown on the x-axis, the number of counted events is shown on the y-axis.



### Supplemental Fig. S10

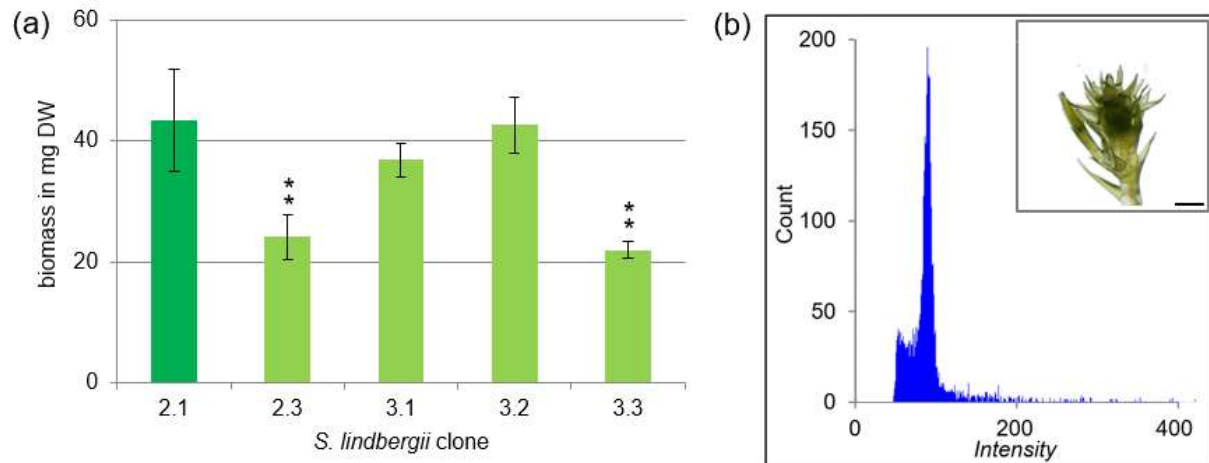

**Fig. S10** Determination of the best-growing clone of *S. lindbergii*. The growth of the six clones (2.1, 2.3, 3.1, 3.2 and 3.3) was determined in suspension (a) by measuring the dry weight after cultivation of three capitula in flasks containing 50 ml Sphagnum media for six weeks. The y-axis shows the biomass in mg dry weight, the x-axis shows the clone. Data represents mean values with standard deviations of 3 biological replicates, except for clone 3.1 (2 replicates) (ANOVA  $p < 0.05$ ). Clone 2.1 yielded more biomass compared to clone 2.3\*\* and 3.3\*\*, but the biomass increase is not significantly better than for clone 3.1 and 3.2. Asterisks represent results of student t-test performed in comparison to clone 2.1. \* =  $p < 0.05$ , \*\* =  $p < 0.01$ , \*\*\* =  $p < 0.001$ . The ploidy of the best-growing clone *S. lindbergii* 2.1 was determined by flow cytometry (FCM). (b) Histograms of gametophore samples measured via FCM after cultivation on solid Sphagnum medium for four months and a picture of *S. lindbergii* gametophore after four weeks (scale bar = 1 mm). The channel numbers corresponding to the relative fluorescence intensities of the analysed particles is shown on the x-axis, the number of counted events is shown on the y-axis.

**Supplemental Fig. S11**

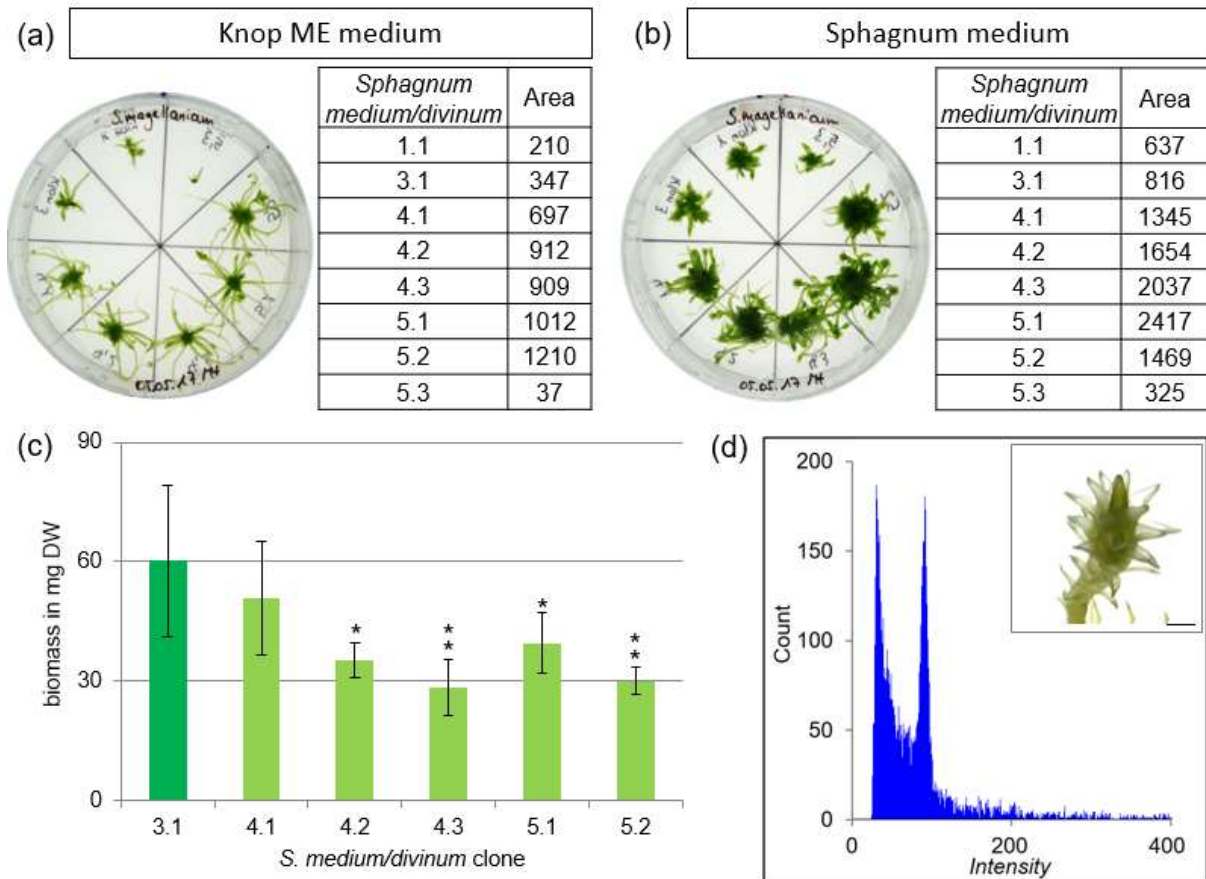

**Fig. S11** Determination of the best-growing clone of *S. medium/divinum*. Growth determination of eight *S. medium/divinum* clones on (a) solid Knop ME and (b) solid Sphagnum medium after four weeks of cultivation. The following clones were arranged counter-clockwise on the Petri dish: 1.1, 3.1, 4.1, 4.2, 4.3, 5.1, 5.2, 5.3. Gametophores were cultivated for four weeks. The size of the gametophores was measured on the basis of binary pictures using ImageJ and shown in the table next to it. The six best-growing clones (3.1, 4.1, 4.2, 4.3, 5.1 and 5.2) were selected and the growth was determined in suspension (c) by measuring the dry weight after cultivation of three capitula in flasks containing 50 ml Sphagnum media for six weeks. The y-axis shows the biomass in mg dry weight, the x-axis shows the clone. Data represents mean values with standard deviations of 3 biological replicates (ANOVA  $p < 0.05$ ). Clone 3.1 yielded more biomass compared to the clones 4.2\*, 4.3\*\*, 5.1\* and 5.2\*\*, but the biomass increase is not significantly better than for clone 4.1. Asterisks represent results of student t-test performed in comparison to clone 3.1. \* =  $p < 0.05$ , \*\* =  $p < 0.01$ , \*\*\* =  $p < 0.001$ . The ploidy of the best-growing clone *S. medium/divinum* 3.1 was determined by flow cytometry (FCM). (d) Histograms of gametophore samples measured via FCM after cultivation on solid Sphagnum medium for four months and a picture of *S. medium/divinum* gametophore after four weeks (scale bar = 1 mm). The channel numbers corresponding to the relative fluorescence intensities of the analysed particles is shown on the x-axis, the number of counted events is shown on the y-axis.

**Supplemental Fig. S12**

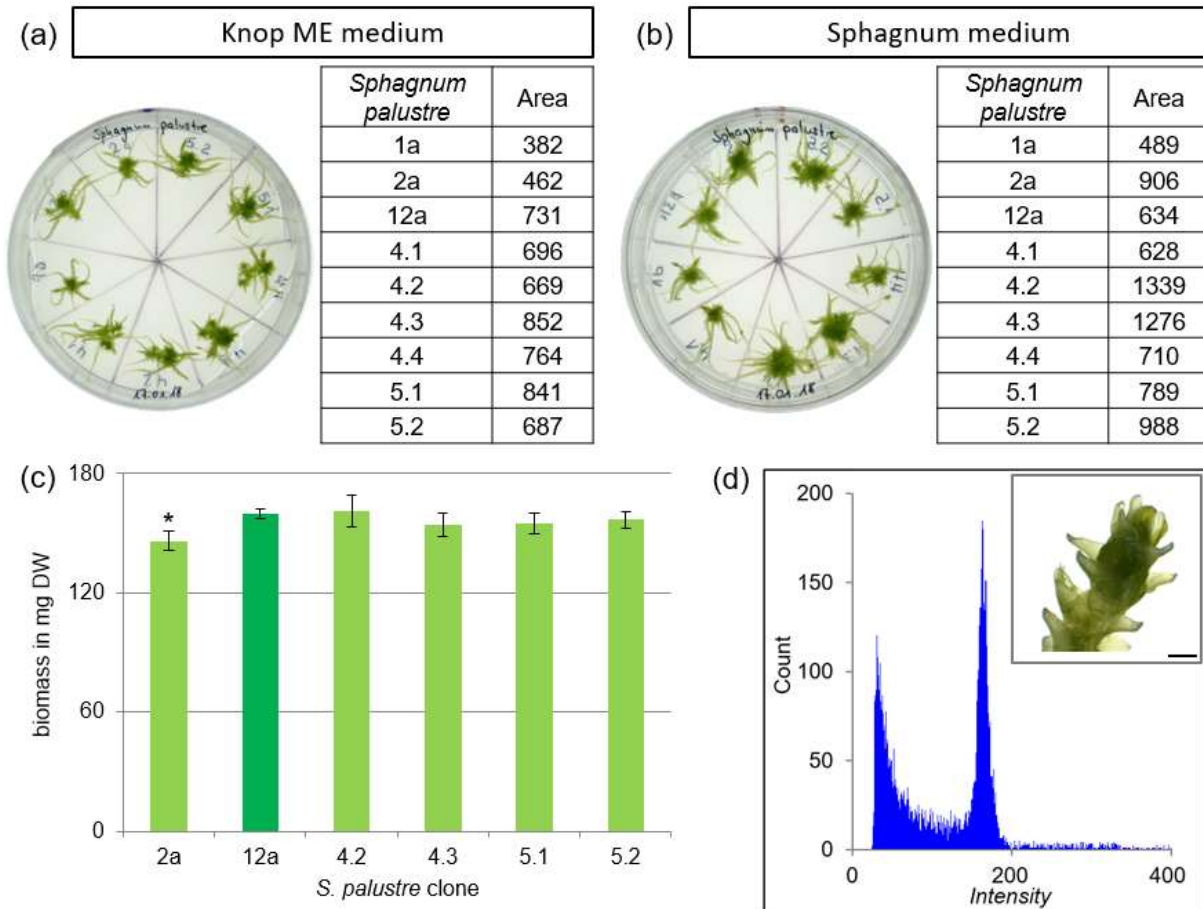

**Fig. S12** Determination of the best-growing clone of *S. palustre*. Growth determination of nine *S. palustre* clones on (a) solid Knop ME and (b) solid Sphagnum medium after four weeks of cultivation. The following clones were arranged counter-clockwise on the Petri dish: 1a, 2a, 12a, 4.1, 4.2, 4.3, 4.4, 5.1, 5.2. Gametophores were cultivated for four weeks. The size of the gametophores was measured on the basis of binary pictures using ImageJ and shown in the table next to it. The six best-growing clones (2a, 12a, 4.2, 4.3, 5.1 and 5.2) were selected and the growth was determined in suspension (c) by measuring the dry weight after cultivation of three capitula in flasks containing 50 ml Sphagnum media for six weeks. The y-axis shows the biomass in mg dry weight, the x-axis shows the clone. Data represents mean values with standard deviations of 3 biological replicates (ANOVA  $p < 0.05$ ). Clone 12a yielded more biomass compared to clone 2a\*, but the biomass increase is not significantly better than for the clones 4.2, 4.3, 5.1 and 5.2. Asterisks represent results of student t-test performed in comparison to clone 12a. \* =  $p < 0.05$ , \*\* =  $p < 0.01$ , \*\*\* =  $p < 0.001$ . The ploidy of the best-growing clone *S. palustre* 12a was measured by flow cytometry (FCM). (d) Histograms of gametophore samples determined via FCM after cultivation on solid Sphagnum medium for four months and a picture of *S. palustre* gametophore after four weeks (scale bar = 1 mm). The channel numbers corresponding to the relative fluorescence intensities of the analysed particles is shown on the x-axis, the number of counted events is shown on the y-axis.

### Supplemental Fig. S13

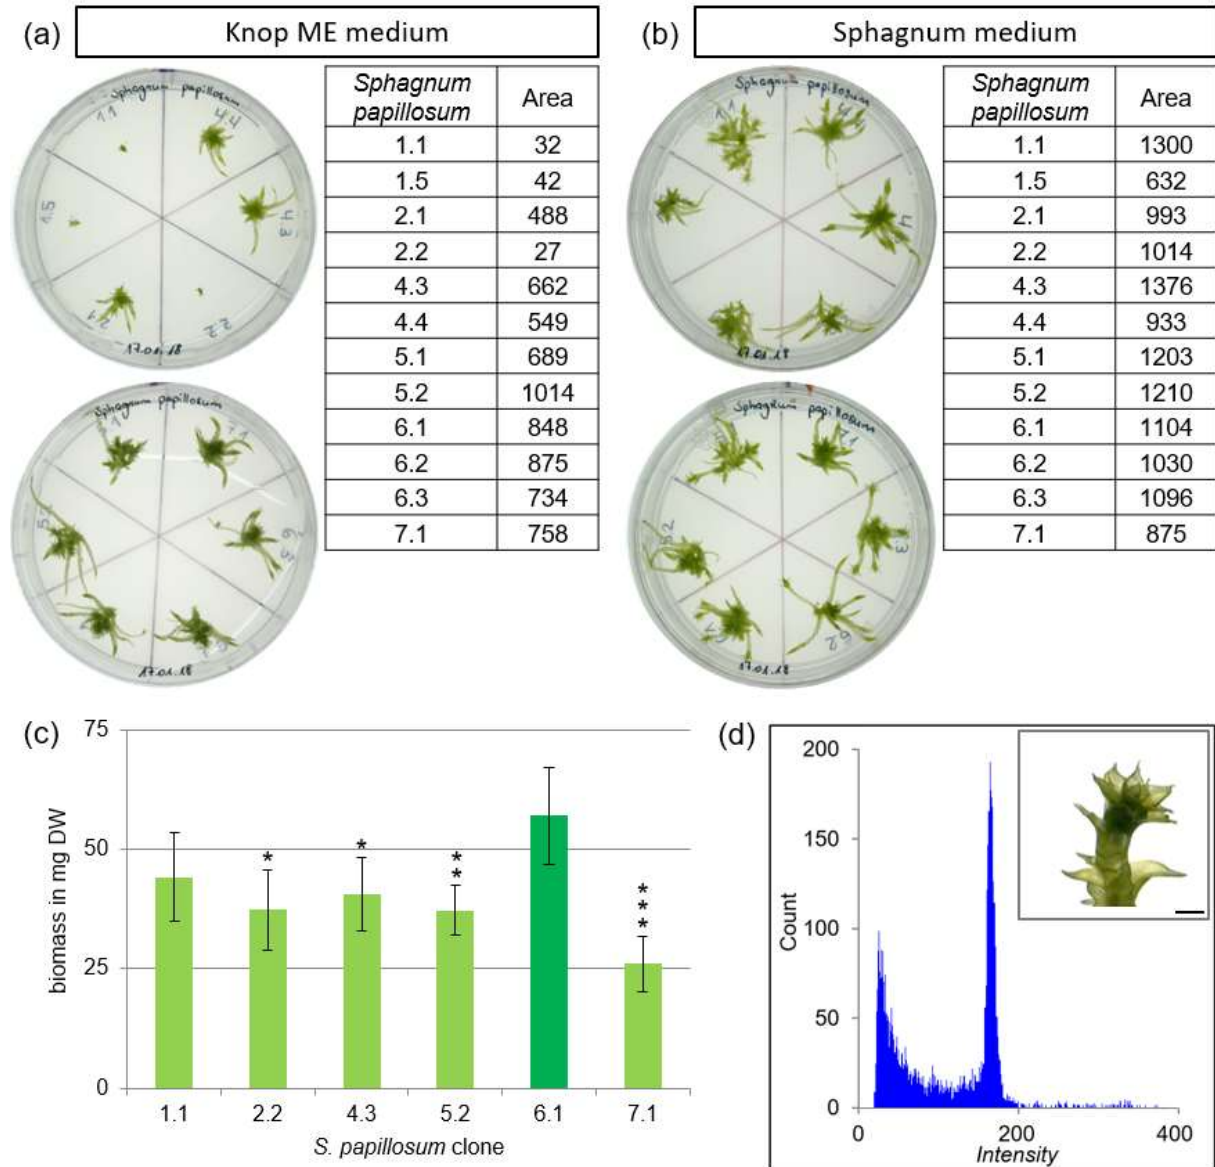

**Fig. S13** Determination of the best-growing clone of *S. papillosum*. Growth determination of 12 *S. papillosum* clones on (a) solid Knop ME and (b) solid Sphagnum medium after four weeks of cultivation. The following clones were arranged counter-clockwise on the Petri dish: 1.1, 1.5, 2.1, 2.2, 4.3, 4.4 on upper and 5.1, 5.2, 6.1, 6.2, 6.3, 7.1 on lower. Gametophores were cultivated for four weeks. The size of the gametophores was measured on the basis of binary pictures using ImageJ and shown in the table next to it. The six best-growing clones (1.1, 2.2, 4.3, 5.2, 6.1 and 7.1) were selected and the growth was determined in suspension (c) by measuring the dry weight after cultivation of three capitula in flasks containing 50 ml Sphagnum media for six weeks. The y-axis shows the biomass in mg dry weight, the x-axis shows the clone. Data represents mean values with standard deviations of 3 biological replicates (ANOVA  $p < 0.05$ ). Clone 6.1 yielded more biomass compared to the clones 2.2\*, 4.3\*, 5.2\*\*, and 7.1\*\*\*, but the biomass increase is not significantly better than for clone 1.1. Asterisks represent results of student t-test performed in comparison to clone 6.1. \* =  $p < 0.05$ , \*\* =  $p < 0.01$ , \*\*\* =  $p < 0.001$ . The ploidy of the best-growing clone *S. papillosum* 6.1 was determined by flow cytometry (FCM). (d) Histograms of gametophore samples measured via FCM after cultivation on solid Sphagnum medium for four months and a picture of *S. papillosum* gametophore after four weeks (scale bar = 1 mm). The channel numbers corresponding to the relative fluorescence intensities of the analysed particles is shown on the x-axis, the number of counted events is shown on the y-axis.

**Supplemental Fig. S14**

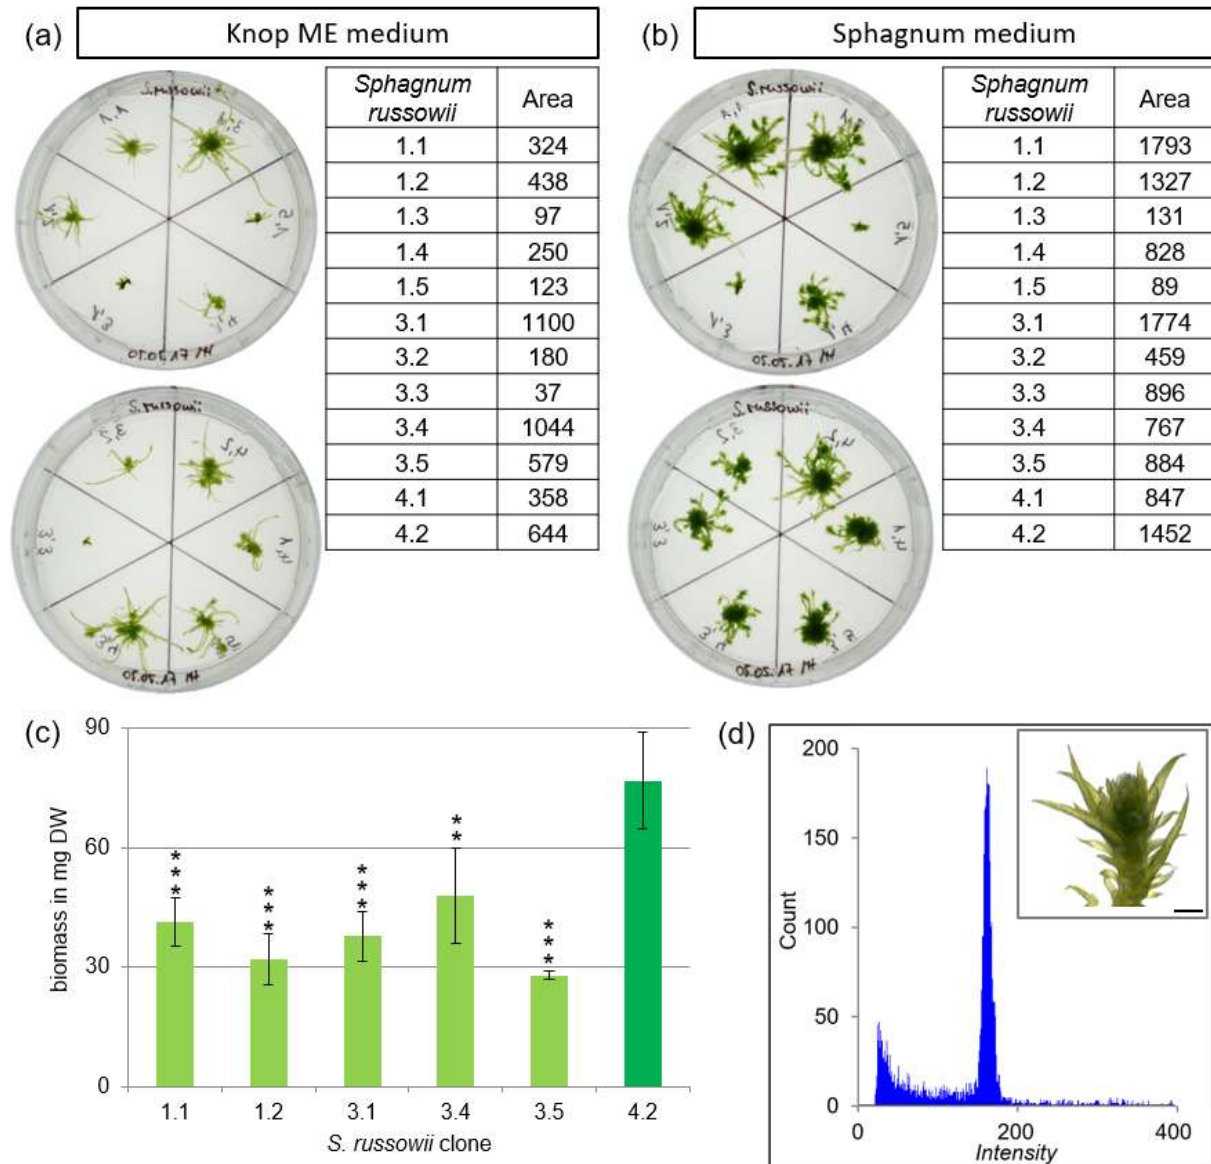

**Fig. S14** Determination of the best-growing clone of *S. russowii*. Growth determination of 12 *S. russowii* clones on (a) solid Knop ME and (b) solid Sphagnum medium after four weeks of cultivation. The following clones were arranged counter-clockwise on the Petri dish: 1.1, 1.2, 1.3, 1.4, 1.5, 3.1 on upper and 3.2, 3.3, 3.4, 3.5, 4.1, 4.2 on lower. Gametophores were cultivated for four weeks. The size of the gametophores was measured on the basis of binary pictures using ImageJ and shown in the table next to it. The six best-growing clones (1.1, 1.2, 3.1, 3.4, 3.5 and 4.2) were selected and the growth was determined in suspension (c) by measuring the dry weight after cultivation of three capitula in flasks containing 50 ml Sphagnum media for six weeks. The y-axis shows the biomass in mg dry weight, the x-axis shows the clone. Data represents mean values with standard deviations of 3 biological replicates (ANOVA  $p=0.0001$ ). Clone 4.2 yielded significantly more biomass compared to the clones 1.1\*\*\*, 1.2\*\*\*, 3.1\*\*\*, 3.4\*\* and 3.5\*\*\*. Asterisks represent results of student t-test performed in comparison to clone 4.2. \* =  $p < 0.05$ , \*\* =  $p < 0.01$ , \*\*\* =  $p < 0.001$ . The ploidy of the best-growing clone *S. russowii* 4.2 was determined by flow cytometry (FCM). (d) Histograms of gametophore samples measured via FCM after cultivation on solid Sphagnum medium for four months and a picture of *S. russowii* gametophore after four weeks (scale bar = 1 mm). The channel numbers corresponding to the relative fluorescence intensities of the analysed particles is shown on the x-axis, the number of counted events is shown on the y-axis.

## Supplemental Fig. S15

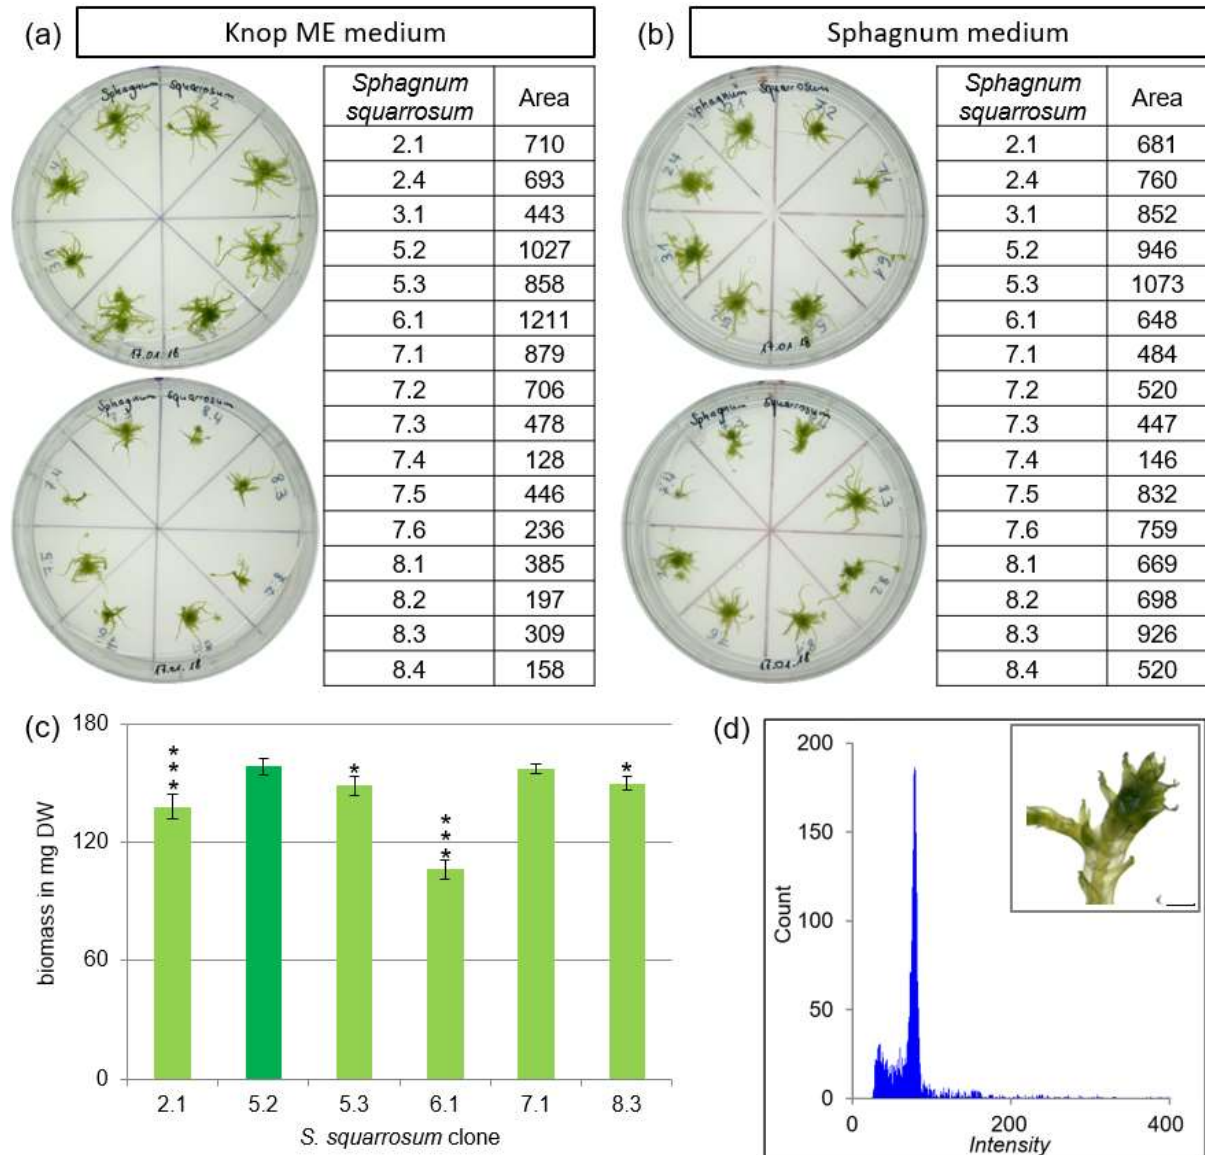

**Fig. S15** Determination of the best-growing clone of *S. squarrosum*. Growth determination of 16 *S. squarrosum* clones on (a) solid Knop ME and (b) solid Sphagnum medium after four weeks of cultivation. The following clones were arranged counter-clockwise on the Petri dish: 2.1, 2.4, 3.1, 5.2, 5.3, 6.1, 7.1, 7.2 on upper and 7.3, 7.4, 7.5, 7.6, 8.1, 8.2, 8.3, 8.4 on lower. Gametophores were cultivated for four weeks. The size of the gametophores was measured on the basis of binary pictures using ImageJ and shown in the table next to it. The six best-growing clones (2.1, 5.2, 5.3, 6.1, 7.1 and 8.3) were selected and the growth was determined in suspension (c) by measuring the dry weight after cultivation of three capitula in flasks containing 50 ml Sphagnum media for six weeks. The y-axis shows the biomass in mg dry weight, the x-axis shows the clone. Data represents mean values with standard deviations of 3 biological replicates (ANOVA  $p < 0.0001$ ). Clone 5.2 yielded more biomass compared to the clones 2.1<sup>\*\*\*</sup>, 5.3<sup>\*</sup>, 6.1<sup>\*\*\*</sup> and 8.3<sup>\*</sup>, but the biomass increase is not significantly better than for clone 7.1. Asterisks represent results of student t-test performed in comparison to clone 5.2. \* =  $p < 0.05$ , \*\* =  $p < 0.01$ , \*\*\* =  $p < 0.001$ . The ploidy of the best-growing clone *S. squarrosum* 5.2 was determined by flow cytometry (FCM). (d) Histograms of gametophore samples measured via FCM after cultivation on solid Sphagnum medium for four months and a picture of *S. squarrosum* gametophore after four weeks (scale bar = 1 mm). The channel numbers corresponding to the relative fluorescence intensities of the analysed particles is shown on the x-axis, the number of counted events is shown on the y-axis.

**Supplemental Fig. S16**

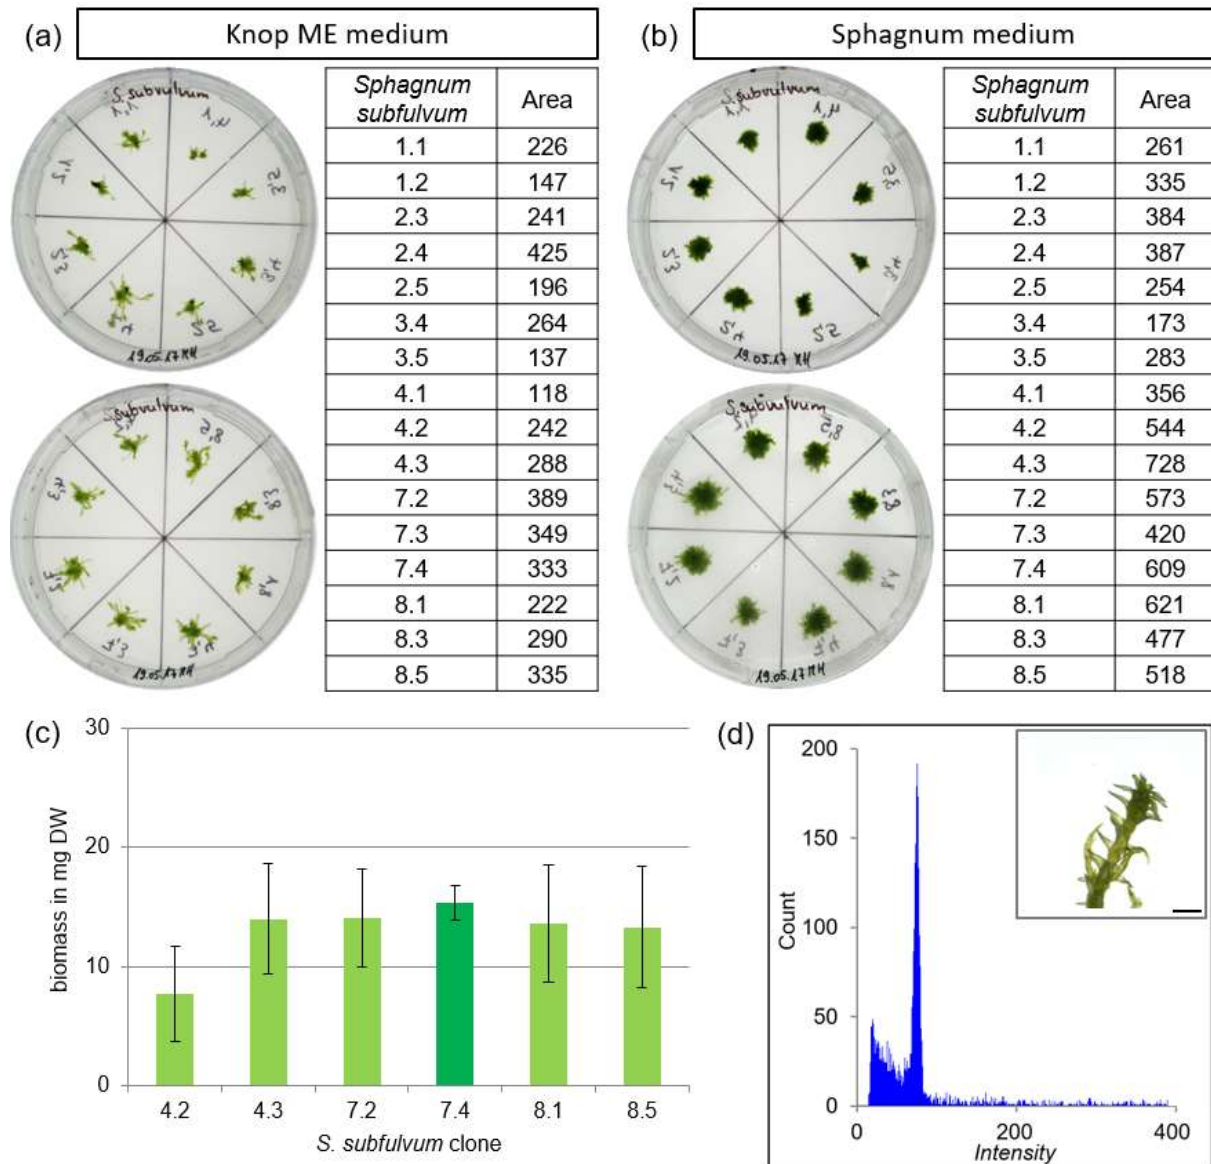

**Fig. S16** Determination of the best-growing clone of *S. subfulvum*. Growth determination of 16 *S. subfulvum* clones on (a) solid Knop ME and (b) solid Sphagnum medium after four weeks of cultivation. The following clones were arranged counter-clockwise on the Petri dish: 1.1, 1.2, 2.3, 2.4, 2.5, 3.4, 3.5, 4.1 on upper and 4.2, 4.3, 7.2, 7.3, 7.4, 8.1, 8.3, 8.5 on lower. Gametophores were cultivated for four weeks. The size of the gametophores was measured on the basis of binary pictures using ImageJ and shown in the table next to it. The six best-growing clones (4.2, 4.3, 7.2, 7.4, 8.1 and 8.5) were selected and the growth was determined in suspension (c) by measuring the dry weight after cultivation of three capitula in flasks containing 50 ml Sphagnum media for six weeks. The y-axis shows the biomass in mg dry weight, the x-axis shows the clone. Data represents mean values with standard deviations of 3 biological replicates (ANOVA  $p > 0.05$ ). Clone 7.4 was selected as best-growing clone. The ploidy of the best-growing clone *S. subfulvum* 7.4 was determined by flow cytometry (FCM). (d) Histograms of gametophore samples measured via FCM after cultivation on solid Sphagnum medium for four months and a picture of *S. subfulvum* gametophore after four weeks (scale bar = 1 mm). The channel numbers corresponding to the relative fluorescence intensities of the analysed particles is shown on the x-axis, the number of counted events is shown on the y-axis.

Supplemental Fig. S17

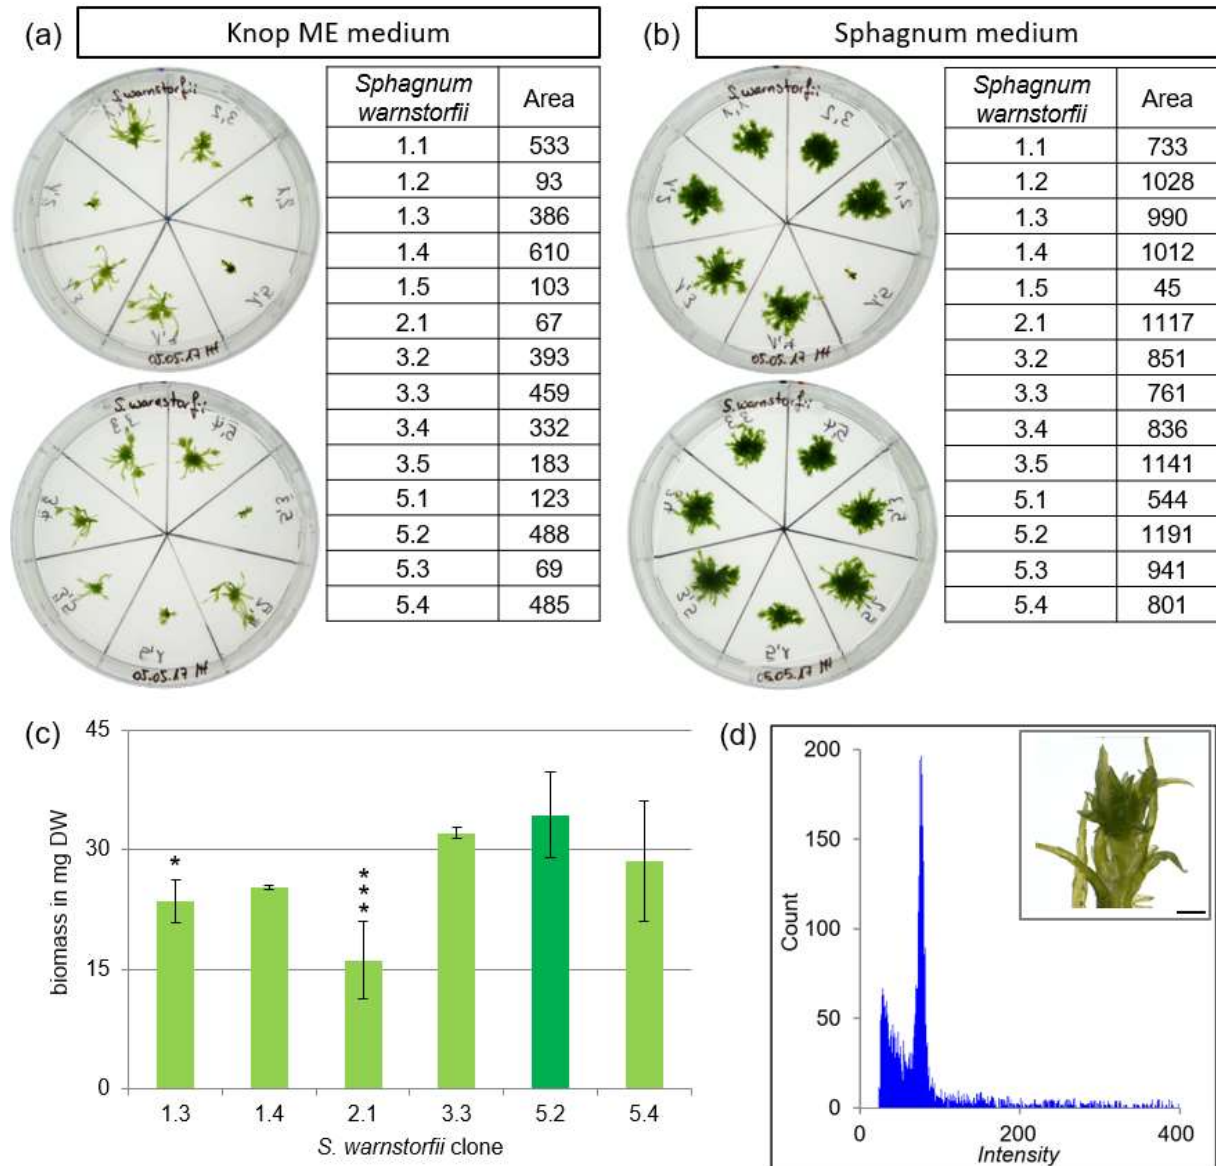

**Fig. S17** Determination of the best-growing clone of *S. warnstorffii*. Growth determination of 14 *S. warnstorffii* clones on (a) solid Knop ME and (b) solid Sphagnum medium after four weeks of cultivation. The following clones were arranged counter-clockwise on the Petri dish: 1.1, 1.2, 1.3, 1.4, 1.5, 2.1, 3.2 on upper and 3.3, 3.4, 3.5, 5.1, 5.2, 5.3, 5.4 on lower. Gametophores were cultivated for four weeks. The size of the gametophores was measured on the basis of binary pictures using ImageJ and shown in the table next to it. The six best-growing clones (4.2, 4.3, 7.2, 7.4, 8.1 and 8.5) were selected and the growth was determined in suspension (c) by measuring the dry weight after cultivation of three capitula in flasks containing 50 ml Sphagnum media for six weeks. The y-axis shows the biomass in mg dry weight, the x-axis shows the clone. Data represents mean values with standard deviations of 3 biological replicates, except for clone 1.4 and 3.3 (2 replicates) (ANOVA  $p < 0.05$ ). Clone 5.2 yielded more biomass compared to clone 1.3\* and 2.1\*\*\*, but the biomass increase is not significantly better than for the clones 1.4, 3.3 and 5.4. Asterisks represent results of student t-test performed in comparison to clone 5.2. \* =  $p < 0.05$ , \*\* =  $p < 0.01$ , \*\*\* =  $p < 0.001$ . The ploidy of the best-growing clone *S. warnstorffii* 5.2 was determined by flow cytometry (FCM). (d) Histograms of gametophore samples measured via FCM after cultivation on solid Sphagnum medium for four months and a picture of *S. warnstorffii* gametophore after four weeks (scale bar = 1 mm). The channel numbers corresponding to the relative fluorescence intensities of the analysed particles is shown on the x-axis, the number of counted events is shown on the y-axis.
